# Supplementary material for: Diagnostic potential of plasma biomarkers and exhaled volatile organic compounds in predicting the different stages of acute mesenteric ischaemia: protocol for a multicentre prospective observational study (TACTIC study)
Source: PubMed Central journal article supplement — BMJ Open. 2023 Aug 29;13(8):e072875. doi: 10.1136/bmjopen-2023-072875 (PMC10465895; doi:10.1136/bmjopen-2023-072875), 2023-08-29
Supplement: bmjopen-2023-072875.draft_revisions.pdf [file bmjopen-2023-072875.draft_revisions.pdf]

# BMJ Open

BMJ Open is committed to open peer review. As part of this commitment we make the peer review history of every article we publish publicly available.

When an article is published we post the peer reviewers' comments and the authors' responses online. We also post the versions of the paper that were used during peer review. These are the versions that the peer review comments apply to.

The versions of the paper that follow are the versions that were submitted during the peer review process. They are not the versions of record or the final published versions. They should not be cited or distributed as the published version of this manuscript.

BMJ Open is an open access journal and the full, final, typeset and author-corrected version of record of the manuscript is available on our site with no access controls, subscription charges or pay-per-view fees (<http://bmjopen.bmj.com>).

If you have any questions on BMJ Open's open peer review process please email [info.bmjopen@bmj.com](mailto:info.bmjopen@bmj.com)

# BMJ Open

## Diagnostic Potential of Plasma Biomarkers and Exhaled Volatile Organic Compounds in Predicting the Different Stages of Acute Mesenteric Ischemia: Study Protocol for a Multicentre Prospective Observational Study (TACTIC trial)

|                               |                                                                                                                                                                                                                                                                                                                                                                                                                                                                                                                                                                                                                                                                                                                                                                                                                                                                                                                                                                                                                                                                                                                                                                                                                                                                                                                                                                                                                                                                                                                                                                                                                                                                                                                                                                                             |
|-------------------------------|---------------------------------------------------------------------------------------------------------------------------------------------------------------------------------------------------------------------------------------------------------------------------------------------------------------------------------------------------------------------------------------------------------------------------------------------------------------------------------------------------------------------------------------------------------------------------------------------------------------------------------------------------------------------------------------------------------------------------------------------------------------------------------------------------------------------------------------------------------------------------------------------------------------------------------------------------------------------------------------------------------------------------------------------------------------------------------------------------------------------------------------------------------------------------------------------------------------------------------------------------------------------------------------------------------------------------------------------------------------------------------------------------------------------------------------------------------------------------------------------------------------------------------------------------------------------------------------------------------------------------------------------------------------------------------------------------------------------------------------------------------------------------------------------|
| Journal:                      | <i>BMJ Open</i>                                                                                                                                                                                                                                                                                                                                                                                                                                                                                                                                                                                                                                                                                                                                                                                                                                                                                                                                                                                                                                                                                                                                                                                                                                                                                                                                                                                                                                                                                                                                                                                                                                                                                                                                                                             |
| Manuscript ID                 | bmjopen-2023-072875                                                                                                                                                                                                                                                                                                                                                                                                                                                                                                                                                                                                                                                                                                                                                                                                                                                                                                                                                                                                                                                                                                                                                                                                                                                                                                                                                                                                                                                                                                                                                                                                                                                                                                                                                                         |
| Article Type:                 | Protocol                                                                                                                                                                                                                                                                                                                                                                                                                                                                                                                                                                                                                                                                                                                                                                                                                                                                                                                                                                                                                                                                                                                                                                                                                                                                                                                                                                                                                                                                                                                                                                                                                                                                                                                                                                                    |
| Date Submitted by the Author: | 17-Feb-2023                                                                                                                                                                                                                                                                                                                                                                                                                                                                                                                                                                                                                                                                                                                                                                                                                                                                                                                                                                                                                                                                                                                                                                                                                                                                                                                                                                                                                                                                                                                                                                                                                                                                                                                                                                                 |
| Complete List of Authors:     | <p>Duivenvoorden, Annet; Maastricht University, Department of Surgery, NUTRIM School of Nutrition and Translational Research in Metabolism<br/> Clarysse, Mathias; KU Leuven, Abdominal Transplant Laboratory, Department of Microbiology, Immunology and Transplantation; KU Leuven University Hospitals Leuven, Department of Abdominal Transplant Surgery and Transplant Coordination<br/> Ceulemans, Laurens; KU Leuven University Hospitals Leuven, Leuven Intestinal Failure and Transplantation Center (LIFT); KU Leuven University Hospitals Leuven, Laboratory of Respiratory Diseases and Thoracic Surgery (BREATHE), Department of Thoracic Surgery<br/> Geelkerken, Robert H.; Medisch Spectrum Twente, Vascular Surgery; University of Twente, TechMed Centre<br/> Derikx, Joep; Amsterdam UMC Location AMC, Department of Pediatric Surgery, Amsterdam Reproduction and Development Research Institute<br/> de Vries, Jean-Paul; University of Groningen, Department of Surgery<br/> Buscher, Hessel; Gelre Ziekenhuizen, Department of Surgery<br/> Damink, S. ; Maastricht University, Department of Surgery, NUTRIM School of Nutrition and Translational Research in Metabolism; RWTH Aachen University, Department of General, Visceral and Transplantation Surgery, University Hospital<br/> van Schooten, Frederik; Maastricht University, Department of Pharmacology and Toxicology, NUTRIM School of Nutrition and Translational Research in Metabolism<br/> Lubbers, Tim ; Maastricht University Medical Centre+, Department of Surgery and GROW School for Oncology and Developmental Biology<br/> Lenaerts, K.; Maastricht University, Department of Surgery<br/> DMIS, Dutch Mesenteric Ischemia Study group; Medisch Spectrum Twente, Department of Surgery</p> |
| Keywords:                     | SURGERY, GASTROENTEROLOGY, Clinical Trial, Decision Making, INTENSIVE & CRITICAL CARE                                                                                                                                                                                                                                                                                                                                                                                                                                                                                                                                                                                                                                                                                                                                                                                                                                                                                                                                                                                                                                                                                                                                                                                                                                                                                                                                                                                                                                                                                                                                                                                                                                                                                                       |
|                               |                                                                                                                                                                                                                                                                                                                                                                                                                                                                                                                                                                                                                                                                                                                                                                                                                                                                                                                                                                                                                                                                                                                                                                                                                                                                                                                                                                                                                                                                                                                                                                                                                                                                                                                                                                                             |

1  
2  
3  
4  
5  
6  
7  
8  
9  
10  
11  
12  
13  
14  
15  
16  
17  
18  
19  
20  
21  
22  
23  
24  
25  
26  
27  
28  
29  
30  
31  
32  
33  
34  
35  
36  
37  
38  
39  
40  
41  
42  
43  
44  
45  
46  
47  
48  
49  
50  
51  
52  
53  
54  
55  
56  
57  
58  
59  
60

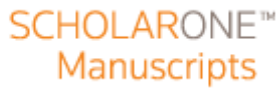

1  
2  
3  
4  
5  
6  
7  
8  
9  
10  
11  
12  
13  
14  
15  
16  
17  
18  
19  
20  
21  
22  
23  
24  
25  
26  
27  
28  
29  
30  
31  
32  
33  
34  
35  
36  
37  
38  
39  
40  
41  
42  
43  
44  
45  
46  
47  
48  
49  
50  
51  
52  
53  
54  
55  
56  
57  
58  
59  
60

# Diagnostic Potential of Plasma Biomarkers and Exhaled Volatile Organic Compounds in Predicting the Different Stages of Acute Mesenteric Ischemia: Study Protocol for a Multicentre Prospective Observational Study (TACTIC trial)

A.A.M. Duivenvoorden<sup>1</sup>, M. Clarysse<sup>2,3</sup>, L.J. Ceulemans<sup>4,5</sup>, R.H. Geelkerken<sup>6,7</sup>, J.P.M. Derikx<sup>8</sup>, J.P.P.M. de Vries<sup>9</sup>, H.C.J.L. Buscher<sup>10</sup>, S.W.M. Olde Damink<sup>1,11</sup>, F.J. van Schooten<sup>11</sup>, T. Lubbers<sup>12</sup>, K. Lenaerts<sup>1</sup>, Dutch Mesenteric Ischemia Study (DMIS) group\*

1. Department of Surgery, NUTRIM School of Nutrition and Translational Research in Metabolism, Maastricht University, Maastricht, the Netherlands
2. Abdominal Transplant Laboratory, Department of Microbiology, Immunology and Transplantation, KU Leuven, Leuven, Belgium.
3. Department of Abdominal Transplant Surgery and Transplant Coordination, University Hospitals Leuven, Leuven, Belgium.
4. Leuven Intestinal Failure and Transplantation Center (LIFT), University Hospitals Leuven, Leuven, Belgium.
5. Laboratory of Respiratory Diseases and Thoracic Surgery (BREATHE), Department of Thoracic Surgery, University Hospitals Leuven, Leuven, Belgium.

- 1 6. Multi-Modality Medical Imaging Group, TechMed Centre, University of Twente,  
2  
3  
4 Enschede, The Netherlands
- 5  
6 7. Department of Vascular Surgery, Medisch Spectrum Twente, Enschede, The  
7  
8  
9 Netherlands
- 10  
11 8. Amsterdam UMC Location AMC, Department of Pediatric Surgery, Amsterdam  
12  
13  
14  
15  
16  
17  
18  
19  
20  
21  
22  
23  
24  
25  
26  
27  
28  
29  
30  
31  
32  
33  
34  
35  
36  
37  
38  
39  
40  
41  
42  
43  
44  
45  
46  
47  
48  
49  
50  
51  
52  
53  
54  
55  
56  
57  
58  
59  
60  
12. Department of Pharmacology and Toxicology, NUTRIM School of Nutrition and  
Translational Research in Metabolism, Maastricht University, Maastricht, The  
Netherlands
13. Department of Surgery, Maastricht University Medical Centre+, Maastricht, the  
Netherlands and GROW School for Oncology and Developmental Biology,  
Maastricht University, Maastricht, The Netherlands

#### \* Collaborators

*Dutch Mesenteric Ischemia Study (DMIS) group:* Ron Balm, Gert Jan de Borst, Juliette T Blauw, Marco J Bruno, Olaf J Bakker, Louisa J D van Dijk, Hessel C J L Buscher, Bram Fioole, Robert H Geelkerken, Jaap F Hamming, Jihan Harki, Daniel A F van den Heuvel, Eline S van Hattum, Jan Willem Hinnen, Jeroen J

1 Kolkman, Maarten J van der Laan, Kaatje Lenaerts, Adriaan Moelker, Desirée van  
2 Noord, Maikel P Peppelenbosch, André S van Petersen, Pepijn Rijnja, Peter J van der  
3 Schaar, Luke G Terlouw, Hence J M Verhagen, Jean Paul P M de Vries, Dammis  
4 Vroegindewij.  
5  
6  
7  
8  
9  
10  
11  
12  
13  
14  
15  
16  
17  
18  
19  
20  
21  
22  
23  
24  
25  
26  
27  
28  
29  
30  
31  
32  
33  
34  
35  
36  
37  
38  
39  
40  
41  
42  
43  
44  
45  
46  
47  
48  
49  
50  
51  
52  
53  
54  
55  
56  
57  
58  
59  
60

For peer review only

1           **CORRESPONDING AUTHOR**  
2  
3  
4

5           Kaatje Lenaerts, PhD  
6  
7

8  
9           Maastricht University  
10  
11

12  
13           Department of Surgery  
14  
15

16  
17           P.O. Box 616  
18  
19

20  
21           Maastricht, 6200 MD  
22  
23

24  
25           Netherlands  
26  
27

28  
29           Phone: +31433881547  
30  
31

32  
33           Email: [kaatje.lenaerts@maastrichtuniversity.nl](mailto:kaatje.lenaerts@maastrichtuniversity.nl)  
34  
35  
36  
37  
38  
39  
40  
41  
42  
43  
44  
45  
46  
47  
48  
49  
50  
51  
52  
53  
54  
55  
56  
57  
58  
59  
60

For peer review only

## ABSTRACT

**Introduction:** Acute Mesenteric ischemia (AMI) is a life-threatening condition with short-term mortality of up to 80% of all cases. The diagnosis of AMI has remained troublesome due to the non-specific clinical presentation, symptoms, and laboratory findings. Early unambiguous diagnosis of AMI is critical to prevent progression from reversible to irreversible transmural intestinal damage, thereby decreasing morbidity and improving survival. The present study aims to validate a panel of plasma biomarkers and investigate the potential of volatile organic compounds (VOCs) analysis in exhaled air as a tool to timely and accurately diagnose AMI.

**Methods and analysis:** In this international multicentre prospective observational study, 120 patients (> 18 years of age) will be recruited with clinical suspicion of AMI. Clinical suspicion of AMI is based on a combination of the following criteria: (1) clinical manifestation, (2) physical examination, (3) laboratory measurements, and (4) the physician's consideration to perform a computed tomography (CT) scan. Upon consent, the patient's characteristics, repetitive blood samples, and exhaled air will be prospectively collected. Plasma levels of mucosal damage markers intestinal fatty acid



1 binding protein and villin-1, as well as transmural damage marker smooth muscle 22,  
2  
3  
4 will be assessed by enzyme-linked immunosorbent assay. Analysis of VOCs in  
5  
6  
7  
8 exhaled air will be performed by gas chromatography time-of-flight mass spectrometry  
9  
10  
11 to identify an AMI-specific profile. Diagnosis of mesenteric ischemia will be based on  
12  
13  
14  
15 CT, endovascular and surgical reports, clinical findings, and (if applicable) verified by  
16  
17  
18 histopathological examination.  
19

20  
21  
22  
23  
24  
25 **Ethics and dissemination:** The TACTIC trial protocol was approved by the Medical  
26  
27  
28  
29 Research Ethics Committee of Maastricht University Medical Centre+ and Maastricht  
30  
31  
32 University (METC azM/UM), the Netherlands (registration number METC19-010) and  
33  
34  
35 the Ethics Committee Research UZ/KU Leuven, Belgium (registration number  
36  
37  
38 S63500) as well as the local committees of the other Dutch participating centres.  
39  
40  
41  
42  
43 Recruitment started in July 2020 and is still ongoing.  
44  
45

#### 46 **KEYWORDS**

47  
48  
49 acute mesenteric ischemia; plasma and serum biomarkers; volatile organic  
50  
51  
52  
53 compounds, diagnosis.  
54

#### 55 **TRIAL REGISTRATION**

56  
57  
58  
59  
60 A summary about the study protocol and trial registration is found below (Table 1).

Table 1: Trial registration, data set (SPIRIT)

| Data category                                 | Information                                                                                                                                                                                                                                                      |
|-----------------------------------------------|------------------------------------------------------------------------------------------------------------------------------------------------------------------------------------------------------------------------------------------------------------------|
| Primary registry and trial identifying number | ClinicalTrials.gov NCT05194527<br><a href="https://clinicaltrials.gov/ct2/show/NCT05194527">https://clinicaltrials.gov/ct2/show/NCT05194527</a>                                                                                                                  |
| Date of registration in primary registry      | 18 January, 2022                                                                                                                                                                                                                                                 |
| Secondary identifying numbers                 | NL68026.068.19/METC19-010                                                                                                                                                                                                                                        |
| Source(s) of monetary or material support     | The Dutch Digestive Foundation (MLDS)                                                                                                                                                                                                                            |
| Primary sponsor                               | Maastricht University, Universiteitssingel 50, 6200 MD, Maastricht Limburg, the Netherlands                                                                                                                                                                      |
| Secondary sponsor(s)                          | N.A.                                                                                                                                                                                                                                                             |
| Contact for public queries                    | Annet Duivenvoorden:<br><a href="mailto:annet.duivenvoorden@maastrichtuniversity.nl">annet.duivenvoorden@maastrichtuniversity.nl</a><br>Kaatje Lenaerts:<br><a href="mailto:kaatje.lenaerts@maastrichtuniversity.nl">kaatje.lenaerts@maastrichtuniversity.nl</a> |
| Contact for scientific queries                | Annet Duivenvoorden:<br><a href="mailto:annet.duivenvoorden@maastrichtuniversity.nl">annet.duivenvoorden@maastrichtuniversity.nl</a><br>Kaatje Lenaerts:<br><a href="mailto:kaatje.lenaerts@maastrichtuniversity.nl">kaatje.lenaerts@maastrichtuniversity.nl</a> |
| Public title                                  | The detrimental course of acute intestinal ischemia:<br>Improvement of the diagnosis                                                                                                                                                                             |
| Scientific title                              | Diagnostic Potential of Plasma Biomarkers and Exhaled Volatile Organic Compounds in Predicting the Different Stages of Acute Mesenteric Ischemia                                                                                                                 |

Table 1: Trial registration, data set (SPIRIT)

| Data category                             | Information                                                                                                                                                                                                                                                                                                                                          |
|-------------------------------------------|------------------------------------------------------------------------------------------------------------------------------------------------------------------------------------------------------------------------------------------------------------------------------------------------------------------------------------------------------|
| Countries of recruitment                  | The Netherlands and Belgium                                                                                                                                                                                                                                                                                                                          |
| Health condition(s) or problem(s) studied | Acute Mesenteric Ischemia, Diagnosis, biomarkers                                                                                                                                                                                                                                                                                                     |
| Intervention(s)                           | N.A.                                                                                                                                                                                                                                                                                                                                                 |
| Key inclusion and exclusion criteria      | Ages eligible for study: $\geq 18$ years<br>Sexes eligible for study: both<br>Accepts healthy volunteers: no                                                                                                                                                                                                                                         |
|                                           | Inclusion Criteria:<br>All patients suspected with acute mesenteric ischemia based on the following; <ul style="list-style-type: none"> <li>• clinical manifestation;</li> <li>• physical examination by the physician;</li> <li>• laboratory measurements;</li> <li>• physician's consideration to perform computed tomography (CT)-scan</li> </ul> |
|                                           | Exclusion criteria: Age $\leq 18$ years                                                                                                                                                                                                                                                                                                              |
| Study type                                | Observational                                                                                                                                                                                                                                                                                                                                        |
|                                           | Allocation: Prospective Cohort study                                                                                                                                                                                                                                                                                                                 |
| Date of first enrolment                   | June 2020                                                                                                                                                                                                                                                                                                                                            |
| Target sample size                        | 120                                                                                                                                                                                                                                                                                                                                                  |
| Recruitment status                        | Recruiting                                                                                                                                                                                                                                                                                                                                           |

Table 1: Trial registration, data set (SPIRIT)

| Data category          | Information                                                                                                                                                                                                                                                                                                            |
|------------------------|------------------------------------------------------------------------------------------------------------------------------------------------------------------------------------------------------------------------------------------------------------------------------------------------------------------------|
| Primary outcome(s)     | The primary outcome is plasma/serum concentrations of I-FABP, VIL-1 (markers for mucosal damage), and SM22 (a marker for transmural ischemia) in patients with a clinical suspicion of AMI. The sensitivity and specificity of the described biomarkers will be determined and compared with the current gold standard |
| Key secondary outcomes | This study's secondary outcome is identifying specific VOC profiles in exhaled air of patients suspected of AMI. Individual compounds of these profiles will be chemically identified to discover novel pathophysiologic pathways involved in AMI                                                                      |

peer review only

## PROTOCOL VERSION

Issue date: 20-03-2020

Version: 4 (February 24, 2020)

Protocol amendment number: 1

Authors: Annet Duivenvoorden (AD) and Kaatje Lenaerts (KL)

Primary reason for amendment: Change of primary sponsor

## CLINICAL TRIAL PROTOCOL GUIDELINES

The manuscript has been written according to the SPIRIT reporting (1) and STARD guidelines (2).

## STRENGTHS AND LIMITATIONS OF THIS STUDY

- This is the first observational prospective clinical study that evaluates a panel of novel biomarkers for acute mesenteric ischemia in a multicentre international clinical cohort.
- This clinical trial will increase awareness of this life-threatening condition, which will help improve clinical outcomes.

- 1  
2  
3  
4  
5  
6  
7  
8  
9  
10  
11  
12  
13  
14  
15  
16  
17  
18  
19  
20  
21  
22  
23  
24  
25  
26  
27  
28  
29  
30  
31  
32  
33  
34  
35  
36  
37  
38  
39  
40  
41  
42  
43  
44  
45  
46  
47  
48  
49  
50  
51  
52  
53  
54  
55  
56  
57  
58  
59  
60
- This trial will provide the first data on breath analysis in patients suspected of acute mesenteric ischemia.
  - This trial will rely on accurate clinical documentation and a high-quality biobank.
  - Patient inclusion is challenging due to acute condition of most patients and low incidence of acute mesenteric ischemia.

For peer review only

## INTRODUCTION

### Background

Acute mesenteric ischemia (AMI) is a life-threatening condition caused by a sudden interruption of blood flow, resulting in decreased supply of oxygen and nutrients to a segment of the intestinal tract. Prolonged periods of AMI lead to cellular damage and, when left untreated, to necrosis of the intestinal wall, which may cause peritonitis (3, 4). The occurrence of AMI is rare, with a reported incidence between 0.09 to 0.2% (for all admissions to emergency departments) in patients with an unknown cause of abdominal pain (5-7) but strongly increases with age (8). It remains a highly underestimated clinical emergency with short-term mortality of up to 80% (9-13). The clinical presentation for AMI is marked by non-specific signs and symptoms, including abdominal pain, elevated white blood cell count, and metabolic acidosis (9, 11, 12, 14). The non-specific clinical presentation of AMI, combined with the absence of a specific serum/plasma marker, often leads to a delay in the diagnosis. Available conventional blood laboratory tests such as leucocytes, c-reactive protein, lactate, and D-dimer have a restricted specificity to aid in diagnosing AMI (15-19). Radiological imaging is one of the most commonly used non-invasive techniques for confirming

1 AMI. (14, 20, 21). Computed tomography can be performed quickly compared with  
2  
3  
4 standard laboratory tests, and when combined with contrast enhancement of the  
5  
6  
7 vessels, so-called CT angiography (CTA) provides a detailed visualization of the  
8  
9  
10 intestines and mesenteric vasculature. CTA is the current gold standard imaging  
11  
12  
13 modality for diagnosing AMI, with an estimated sensitivity and specificity of around 89-  
14  
15  
16 100% (14, 15). However, this is probably an overestimation since the study cohort  
17  
18  
19 primarily consisted of patients with advanced mesenteric ischemia and not early or  
20  
21  
22 progressive mesenteric ischemia (8). Moreover, a considerable percentage of patients  
23  
24  
25 with AMI present without ischemia-specific CT signs, which overlap with other acute  
26  
27  
28 abdominal complications (22-24). Therefore, an around-the-clock available, highly  
29  
30  
31 accurate, minimally invasive, and rapid diagnostic test can increase the index of  
32  
33  
34 suspicion for early AMI, reducing the time to adequate treatment.  
35  
36  
37  
38  
39  
40  
41  
42

43 In recent years, several clinical studies investigated more specific serological markers  
44  
45  
46 for diagnosing AMI and determining the severity of ischemic intestinal damage (25-  
47  
48  
49 27). One of these potential biomarkers for AMI is intestinal fatty acid binding protein  
50  
51  
52 (I-FABP), a small cytosolic protein that is abundantly expressed in mature enterocytes  
53  
54  
55  
56  
57 (28, 29). Upon a decrease in bowel perfusion and consequent loss of enterocyte cell  
58  
59  
60



1 membrane integrity, a rapid release of I-FABP within the circulation is observed (25).  
2  
3  
4 Another mucosal marker for detecting intestinal mucosal damage is villin-1 (VIL-1),  
5  
6  
7  
8 which, similar to I-FABP, is detectable in the plasma of rat and human models of  
9  
10  
11 mesenteric ischemia (26). As opposed to I-FABP, VIL-1 remains detectable in plasma  
12  
13  
14  
15 for more extended periods after the onset of ischemic damage in rats (25, 26). These  
16  
17  
18 findings identify I-FABP as a potential marker for early intestinal mucosal injury and  
19  
20  
21 VIL-1 as a potential marker for persisting ischemic mucosal damage. Sustained  
22  
23  
24  
25 periods of mesenteric ischemia can lead to ischemia of the intestinal muscle layers  
26  
27  
28 and, when left untreated, result in transmural ischemia. Currently, known markers of  
29  
30  
31 mesenteric ischemic damage focus primarily on mucosal injury, but they provide no  
32  
33  
34  
35 insight regarding the possible Development of transmural ischemia. An earlier study  
36  
37  
38 showed that plasma levels of smooth muscle 22 (SM22) could differentiate between  
39  
40  
41 patients with transmural ischemia and those with mesenteric ischemia confined to the  
42  
43  
44  
45 mucosal layer (27). SM22 is a small protein (22 kDa) with a high expression in  
46  
47  
48  
49 intestinal smooth muscle tissue (30, 31) and is released upon sustaining ischemic  
50  
51  
52  
53 damage. However, the SM22 protein is not exclusively expressed in the intestinal  
54  
55  
56  
57 muscle tissue (31). Still, in combination with other specific markers for intestinal  
58  
59  
60 mucosal damage, such as I-FABP, it is expected to provide insight into the severity

1 and progression of intestinal injury in patients with AMI. Unfortunately, none of the  
2  
3  
4 described markers have yet to make their appearance in the clinic. Currently, there is  
5  
6  
7  
8 limited knowledge of the I-FABP, VIL-1, and SM22 specificity in patients with AMI.  
9

10  
11  
12 In recent years, analysis of volatile organic compounds (VOCs) in exhaled air to  
13  
14  
15 diagnose various pathologies has gained increasing interest. The exhaled air of  
16  
17  
18 humans consists of a broad spectrum of VOCs. The composition of these VOCs is  
19  
20  
21 influenced by exogenous (oral ingestion, smoking, air quality) and endogenous  
22  
23  
24 (activity, microbiome, hormonal) factors (32). The hundreds of VOCs in exhaled air  
25  
26  
27 can give valuable information about various (patho)physiologic processes. The  
28  
29  
30 analysis of VOCs in exhaled air is a non-invasive technique that has already been  
31  
32  
33 demonstrated to differentiate between multiple clinical conditions and healthy  
34  
35  
36 subjects, including inflammatory bowel disease and non-alcoholic steatohepatitis (33).  
37  
38  
39  
40 As the pathophysiologic processes of inflammatory bowel disease and AMI share  
41  
42  
43 common mechanisms, it is expected that VOC profiling could aid in diagnosing AMI in  
44  
45  
46  
47 a rapid and non-invasive manner in the future (34).  
48  
49  
50  
51  
52  
53  
54  
55  
56  
57  
58  
59  
60

## METHODS AND ANALYSIS

### Objectives

This study aims to improve the diagnosis of patients with AMI. Our primary objective is to validate the diagnostic accuracy of a selected panel of plasma and serum biomarkers, I-FABP, SM22, and VIL-1, in patients with AMI. Furthermore, we will investigate if these markers can determine the severity of ischemic intestinal damage.

The secondary objective of this study is to identify a VOC profile in exhaled breath to identify AMI non-invasively.

### Study design and eligibility criteria

The current study is an international multicentre, prospective observational study aiming to include 120 patients with acute abdominal symptoms fitting to AMI. The main objective is to compare biomarker expression in 60 patients with confirmed mesenteric ischemia and 60 patients with another clinical condition. We may include a higher percentage of patients without mesenteric ischemia due to its non-specific clinical presentation and low overall incidence. Therefore, study inclusions will be finalized when 60 patients with confirmed AMI are included (5-7). Patients clinically suspected of AMI will be screened for inclusion at one of the participating centres. All study

1 participants must fulfill the study inclusion criteria and will be excluded from  
2  
3  
4 participation if they cannot provide written informed consent or do not fulfill the  
5  
6  
7 inclusion criteria (Text Box 1: Inclusion and exclusion criteria). Clinical study  
8  
9  
10 procedures are initiated when all criteria are met and informed consent is obtained  
11  
12  
13 from the patient or legal representative. After inclusion, blood and exhaled breath will  
14  
15  
16 be collected at consecutive time points (Figure 1).  
17  
18  
19  
20  
21  
22  
23  
24  
25  
26  
27  
28  
29  
30  
31  
32  
33  
34  
35  
36  
37  
38  
39  
40  
41  
42  
43  
44  
45  
46  
47  
48  
49  
50  
51  
52  
53  
54  
55  
56  
57  
58  
59  
60

For peer review only

## Study Sponsor

The sponsor (Maastricht University, Maastricht, The Netherlands) is responsible for the study design and management and for obtaining all study authorizations (Clinical Trial Centre Maastricht and medical research ethics committee). Furthermore, the study sponsor also declares all information regarding the inclusion period, beginning and end, final study report, and trial results to these authorities. Last, all obtained study samples and study-related documents will be stored for at least 15 years after the study ends.

## Study population and participating medical centres

The study population will consist of patients clinically suspected of AMI admitted at Maastricht University Medical Centre+ (MUMC+, Maastricht, The Netherlands), Amsterdam University Medical Centre (AUMC), location VUmc and AMC, Gelre Ziekenhuizen Apeldoorn (Apeldoorn, The Netherlands), Medisch Spectrum Twente, Enschede, The Netherlands, University Medical Centre Groningen, The Netherlands and University Hospitals Leuven, Belgium. The clinical course of all patients will be monitored throughout the study, and medical information will be collected, including medical history, medication, vital signs, medical imaging, and information regarding

1 clinical management during admission. The study has been open for inclusion since  
2  
3  
4 June 2020.  
5  
6  
7

### 8 **Clinical study procedures**

9  
10  
11  
12 Samples will be collected from included patients with a clinical suspicion of AMI at  
13  
14  
15  
16 different time points with an in-hospital follow-up of a maximum of five days after  
17  
18  
19 inclusion (Figure 1). several baseline characteristics will be acquired at inclusion and  
20  
21  
22  
23 during participation. After inclusion, blood and exhaled air samples will be collected  
24  
25  
26 every 60 minutes, up to 180 minutes. Re-establishing blood supply to the ischemic  
27  
28  
29 bowel is the primary objective in patients with AMI. Therefore, patients may undergo  
30  
31  
32  
33 endovascular revascularization to restore mesenteric blood supply. Surgical resection  
34  
35  
36 of the necrotic bowel must occur if there are signs of non-viable tissue regions after  
37  
38  
39 revascularization. If the patient undergoes an endovascular or surgical intervention,  
40  
41  
42  
43 pre-operative and post-operative samples will be taken. Postoperatively, the patient  
44  
45  
46  
47 will be monitored for up to five days, and samples (blood and exhaled air) will be  
48  
49  
50  
51 collected daily, parallel with the morning routine blood collections. In addition, patients  
52  
53  
54  
55 without any treatment interventions will also be monitored for up to five days, and  
56  
57  
58  
59 similar blood and air samples will be obtained identically to patients with a treatment  
60

1 intervention. At the end of the study, each participant will be allocated to one of the  
2  
3  
4 two study groups (AMI versus non-AMI). Diagnosis of mesenteric ischemia will be  
5  
6  
7  
8 based on CT, endovascular and surgical reports, clinical findings, and (if applicable)  
9  
10  
11 verified by histopathological examination.  
12  
13

### 14 **Blood collection and biomarker analysis**

15  
16  
17 In this study, obtained blood samples will be analysed for serum and plasma biomarker  
18  
19  
20 analysis of I-FABP, SM22, and VIL-1. Blood samples will be collected via an arterial  
21  
22  
23 line, an intravenous needle, or a central venous catheter. Occasionally a separate  
24  
25  
26 venapuncture can also be used to collect blood. Blood samples will be collected in  
27  
28  
29 Vacutainer tubes treated with Ethylenediaminetetraacetic acid for plasma and SST™  
30  
31  
32 II Advance tubes for serum specimens. Whole blood samples will be centrifuged, and  
33  
34  
35 plasma/serum will be transferred to storage tubes. After processing, the samples are  
36  
37  
38 stored at -80°C until further analysis. I-FAPB, SM22, and VIL-1 concentrations will be  
39  
40  
41 determined in plasma/serum samples through enzyme-linked immunosorbent assay  
42  
43  
44 (ELISA). Highly specific I-FABP and SM22 ELISAs were developed and validated in  
45  
46  
47 our lab and selectively detect human I-FABP and human SM22 in plasma with a lower  
48  
49  
50 limit of detection of 12.5 pg/mL and 62.5 pg/mL, respectively (27, 35). The intra-assay  
51  
52  
53  
54  
55  
56  
57  
58  
59  
60

1 and inter-assay coefficient of variation is 4.1% and 6.2%, respectively, for IFABP  
2  
3  
4 ranging from 6.2% to 14.8% and 4.9% to 16.3%, respectively, for SM22 (27, 35). VIL-1  
5  
6  
7  
8 ELISA was developed at PharmAbs (KU Leuven, Leuven, Belgium) and can detect  
9  
10  
11 human VIL-1 with a lower detection limit of 0.78 ng/mL (Ceulemans et al. in  
12  
13  
14  
15 preparation).

### 19 **Exhaled breath collection and analysis**

22  
23 This study's second objective focuses on using VOCs in exhaled breath as a potential  
24  
25  
26 diagnostic tool for AMI. Exhaled breath is collected using resistance-free plastic bags  
27  
28  
29 (Tedlar bag, 3L, SKC Ltd, Dorset, UK) parallel to the blood samples. To collect breath  
30  
31  
32  
33 samples, the patient must breathe into the valve of the Tedlar bag, which takes three  
34  
35  
36  
37 to four exhalations to fill. Exhaled breath from an incapacitated patient will be collected  
38  
39  
40  
41 from mechanical ventilation through a co-axial tubing system. Collected exhaled air  
42  
43  
44 containing VOCs is stabilized on carbon desorption tubes (SU60520-60-S, Camsco)  
45  
46  
47 with a Flow air sampling pump (LFS-113, 360-041-01, Sensidyne) and stored at 4°C  
48  
49  
50  
51 until further analysis by gas chromatography time of flight mass spectrometry (GC-  
52  
53  
54 TOF-MS)(34).

### 59 **Study outcomes**



1 We hypothesize that with the use of serum/plasma biomarkers I-FABP, VIL-1, and  
2  
3  
4 SM22, a timely diagnosis of patients with AMI before irreversible transmural bowel  
5  
6  
7 damage occurs will be achieved. Through a multimodal diagnostic approach, we will  
8  
9  
10 be able to characterize each patient's condition and correlate these biomarkers'  
11  
12 concentration to the disease's corresponding etiology. The primary outcome is  
13  
14 plasma/serum concentrations of I-FABP, VIL-1 (markers for mucosal damage), and  
15  
16 SM22 (a marker for transmural ischemia) in patients with a clinical suspicion of AMI.  
17  
18 The sensitivity and specificity of the described biomarkers will be determined and  
19  
20 compared with the current gold standard (14, 15). A receiver operating characteristic  
21  
22 (ROC) curve analysis will be used to evaluate the diagnostic power of the biomarker  
23  
24 (panel) test.

25  
26  
27  
28  
29  
30  
31  
32  
33  
34  
35  
36  
37  
38  
39  
40 This study's secondary outcome is identifying specific VOC profiles in exhaled air of  
41  
42  
43 patients suspected of AMI. Individual compounds of these profiles will be chemically  
44  
45  
46 identified to discover novel pathophysiologic pathways involved in AMI. Furthermore,  
47  
48  
49 these VOC profiles will be used to investigate their potential use as a novel non-  
50  
51  
52  
53  
54  
55  
56  
57  
58  
59  
60  
invasive diagnostic technique for AMI.

#### **Data collection and management**

1 Patients will receive a patient information folder and consent forms before study  
2  
3  
4 initiation, explaining the study procedures in detail and providing information on the  
5  
6  
7  
8 study data collection, protection, and pseudonymization of their medical information.  
9

10  
11 Data will be obtained by the local study teams and registered using study-specific  
12  
13  
14 Case Report Forms (CRFs) and CASTOR (36) electronic data capture (EDC) system,  
15  
16  
17  
18 which facilitates monitoring the study progress and outcomes in real-time. To ensure  
19  
20  
21  
22 the privacy of all individuals in this study, blood and breath samples, data, and results  
23  
24  
25  
26 of our research will be treated confidentially and encoded accordingly. The encoding  
27  
28  
29 of their personal data will ensure the patient's anonymity. The source data and  
30  
31  
32  
33 encoding key for the patient's personal data will only be accessible to the principal and  
34  
35  
36 coordinating investigator. After the termination and publication, the patients can be  
37  
38  
39 informed about their study results, which can be explained to them if requested on  
40  
41  
42  
43 their informed consent form. With the participants' approval in this study, collected  
44  
45  
46  
47 data, blood, and exhaled air will be stored for 15 years for future research purposes.  
48

49  
50 All samples will be transported to the Department of Surgery (Maastricht University,  
51  
52  
53 Maastricht, The Netherlands), where they will be stored and analysed. All data  
54  
55  
56  
57 concerning participants or their participation in this trial will be considered confidential  
58  
59  
60

1 and handled in compliance with all applicable regulations. Only members of the study  
2  
3  
4 team and local investigators have access to these data.  
5  
6  
7

### 8 **Safety Considerations and withdrawal of participation**

10  
11  
12 The study will be suspended if there is sufficient ground that continuation of the study  
13  
14  
15 will jeopardise the subject health or safety. The sponsor will notify the accredited  
16  
17  
18 Medical Ethical Board without undue delay of a temporary halt, including the reason  
19  
20  
21 for such an action. The study will be suspended pending a further favorable decision  
22  
23  
24 by the accredited board. The coordinating researcher will ensure that all subjects are  
25  
26  
27 kept informed during trial participation.  
28  
29  
30  
31  
32

33  
34 Patients participate in this research voluntarily. Any sign of patient resistance will lead  
35  
36  
37 to the discontinuation of research involving this patient. Patients withdraw their  
38  
39  
40 permission and leave the study at any time for any reason if they wish to do so without  
41  
42  
43 any consequences for their further treatment. For example, the investigator can  
44  
45  
46 withdraw a subject from the study for urgent medical reasons. Data obtained during  
47  
48  
49 participation can be used for future research purposes unless the patient or legal  
50  
51  
52 representative gives a written or verbal objection.  
53  
54  
55  
56  
57  
58

### 59 **Sample size**

1 Data from a previous study undertaken by our group was used to determine the  
2  
3  
4 sample size (27). Based on an effect size (medium to large) of 0.631 (calculated with  
5  
6  
7  
8 mean I-FABP levels), with a power of 0.8 and a 95% confidence interval, 54 patients  
9  
10  
11 per group (AMI versus non-AMI) are needed for this cohort. By including 60 patients  
12  
13  
14  
15 per group, possible dropouts (10%, n = 6) are considered.  
16  
17

### 18 19 **Statistical analysis**

20  
21  
22  
23 Statistical analysis will be performed with SPSS software (IBM) and GraphPad Prism  
24  
25  
26  
27 8 software. All the data obtained consists of continuous and categorical variables. The  
28  
29  
30 data will be tested for normality using the Kolmogorov-Smirnov test. Relative changes  
31  
32  
33  
34 between the two groups will be tested using a Student's T-test. Dichotomous variables  
35  
36  
37 will be compared using Pearson's chi-squared test. During the statistical analysis,  
38  
39  
40 numerical values will be reported as mean  $\pm$  standard deviation or median  
41  
42  
43  
44 (Interquartile range, i.e., 25th to 75th percentile). Relevant variables with a p-value  
45  
46  
47  
48  $<0.05$  for univariate analysis were introduced into a multiple logistic regression model  
49  
50  
51 using confidence intervals (CI). The area under the curve (AUC) of receiver operating  
52  
53  
54 characteristic (ROC) curves will be used to assess the functionality of I-FABP, SM22,  
55  
56  
57  
58 and VIL-1 and VOC profiles in predicting AMI. Logistic regression analyses will be  
59  
60

1 performed to investigate the most effective biomarker combination in patients with  
2  
3  
4 ischemia or without ischemia. Furthermore, we will assess the difference in mean I-  
5  
6  
7  
8 FABP, SM22, and VIL1 plasma/serum levels between patients suffering from AMI and  
9  
10  
11 those diagnosed with other clinical conditions at different times. The severity of the  
12  
13  
14  
15 mesenteric ischemic damage will be determined (reversible versus non-reversible  
16  
17  
18 mesenteric ischemic injury) by (1) levels of plasma IFABP, VIL1, and SM22 at baseline  
19  
20  
21 and (2) an increase of IFABP, VIL1, and SM22 plasma levels over time as AMI  
22  
23  
24  
25 progresses (until intervention).  
26  
27  
28

### 29 **Patient and public involvement**

31  
32  
33 A patient panel from The Dutch Digestive Foundation (MLDS) reviewed the grant  
34  
35  
36  
37 proposal to obtain funding. There was no patient or public involvement in the design  
38  
39  
40  
41 of this clinical study.  
42  
43  
44

### 45 **Ethical and dissemination**

46  
47  
48  
49 The TACTIC study protocol was approved (September 4<sup>th</sup>, 2019) by the Medical  
50  
51  
52  
53 Research Ethics Committee of MUMC+ and Maastricht University, the Netherlands  
54  
55  
56 (registration number METC19-010), and the Ethics Committee Research UZ/KU  
57  
58  
59 Leuven, Belgium (registration number S63500), as well as the local committees of the  
60

1 other Dutch participating centres. This study will be conducted according to the  
2  
3  
4 principles of the Declaration of Helsinki (adopted by the 18th WMA General Assembly,  
5  
6  
7  
8 Helsinki, Finland, June 1964, and amended by the 64th WMA General Assembly,  
9  
10  
11 Fortaleza, Brazil, October 2013) in accordance with the WMO. Trial results will be  
12  
13  
14 disseminated via open-access peer-reviewed scientific journals and national and  
15  
16  
17  
18 international conferences.  
19

### 20 21 22 **Funding statement**

23  
24  
25  
26  
27 This study is funded by the MLDS foundation, Amersfoort (grant number D17-14).  
28  
29

### 30 31 **Acknowledgments**

32  
33  
34  
35 We have received funding from MLDS, to conduct the TACTIC trial. We want to thank  
36  
37  
38 S.M.J. van Kuijk for his statistical insights for the study protocol. In addition, we would  
39  
40  
41  
42 like to thank Professor C.H.C De Jong for his indispensable work investigating the  
43  
44  
45 complex multifactorial background of AMI, which led to the discovery of new potential  
46  
47  
48  
49 biomarkers for future clinical applications and improving patients' clinical outcomes.  
50  
51

### 52 53 **Authors' Contributions**

54  
55  
56  
57  
58  
59  
60

1 KL and TL originated the study. AD, KL, LC, and TL were involved in the study design.

2  
3  
4 AD, KL, and TL drafted the manuscript. AD, RG, MC, RG, JV, HB, SD, FJ, LC, TL,

5  
6  
7  
8 and KL are local investigators at the participating centres. The study is supervised and

9  
10  
11 coordinated by AD, KL, and TL. All authors provided essential feedback to the

12  
13  
14  
15 successive manuscript versions and approved the final version.

### 16 17 18 19 **Conflicts of Interest**

20  
21  
22  
23 None declared.

24  
25  
26  
27  
28  
29  
30  
31  
32  
33  
34  
35  
36  
37  
38  
39  
40  
41  
42  
43  
44  
45  
46  
47  
48  
49  
50  
51  
52  
53  
54  
55  
56  
57  
58  
59  
60

For peer review only

1  
2  
3  
4  
5  
6  
7  
8  
9  
10  
11  
12  
13  
14  
15  
16  
17  
18  
19  
20  
21  
22  
23  
24  
25  
26  
27  
28  
29  
30  
31  
32  
33  
34  
35  
36  
37  
38  
39  
40  
41  
42  
43  
44  
45  
46  
47  
48  
49  
50  
51  
52  
53  
54  
55  
56  
57  
58  
59  
60  

## REFERENCES

1. Chan AW, Tetzlaff JM, Gotzsche PC, Altman DG, Mann H, Berlin JA, et al. SPIRIT 2013 explanation and elaboration: guidance for protocols of clinical trials. *BMJ*. 2013;346(jan08 15):e7586-e.
2. Bossuyt PM, Reitsma JB, Bruns DE, Gatsonis CA, Glasziou PP, Irwig L, et al. STARD 2015: an updated list of essential items for reporting diagnostic accuracy studies. *BMJ*. 2015:h5527.
3. Bjarnason I, MacPherson A, Hollander D. Intestinal permeability: an overview. *Gastroenterology*. 1995;108(5):1566-81.
4. DeMeo MT, Mutlu EA, Keshavarzian A, Tobin MC. Intestinal permeation and gastrointestinal disease. *Journal of clinical gastroenterology*. 2002;34(4):385-96.
5. Acosta S, Björck M. Acute thrombo-embolic occlusion of the superior mesenteric artery: A prospective study in a well defined population. *European Journal of Vascular and Endovascular Surgery*. 2003;26(2):179-83.
6. Stoney RJ, Cunningham CG. Acute mesenteric ischemia. *Surgery*. 1993;114(3):489-90.
7. Duran M, Pohl E, Grabitz K, Schelzig H, Sagban TA, Simon F. The importance of open emergency surgery in the treatment of acute mesenteric ischemia. *World Journal of Emergency Surgery*. 2015;10(1).
8. Karkkainen JM, Acosta S. Acute mesenteric ischemia (part I) - Incidence, etiologies, and how to improve early diagnosis. *Best Pract Res Clin Gastroenterol*. 2017;31(1):15-25.
9. Oldenburg WA, Lau LL, Rodenberg TJ, Edmonds HJ, Burger CD. Acute Mesenteric Ischemia. *Archives of Internal Medicine*. 2004;164(10):1054-.
10. Acosta S. Epidemiology of Mesenteric Vascular Disease: Clinical Implications. *Seminars in Vascular Surgery*. 2010;23(1):4-8.
11. Bradbury AW, Brittenden J, McBride K, Ruckley CV. Mesenteric ischaemia: A multidisciplinary approach. *British Journal of Surgery*. 1995;82(11):1446-59.
12. American Gastroenterological Association Medical Position Statement: Guidelines on Intestinal Ischemia.
13. Howard TJ, Plaskon LA, Wiebke EA, Wilcox MG, Madura JA. Nonocclusive mesenteric ischemia remains a diagnostic dilemma. *The American Journal of Surgery*. 1996;171(4):405-8.



- 1 14. Menke J. Diagnostic Accuracy of Multidetector CT in Acute Mesenteric Ischemia:  
2 Systematic Review and Meta-Analysis. *Radiology*. 2010;256(1):93-101.
- 3
- 4 15. Cudnik MT, Darbha S, Jones J, Macedo J, Stockton SW, Hiestand BC. The  
5 Diagnosis of Acute Mesenteric Ischemia: A Systematic Review and Meta-  
6 analysis. *Academic Emergency Medicine*. 2013;20(11):1087-100.
- 7
- 8 16. Björck M, Koelemay M, Acosta S, Bastos Goncalves F, Kölbel T, Kolkman JJ, et  
9 al. Editor's Choice – Management of the Diseases of Mesenteric Arteries and  
10 Veins. *European Journal of Vascular and Endovascular Surgery*.  
11 2017;53(4):460-510.
- 12
- 13 17. Nuzzo A, Maggiori L, Ronot M, Becq A, Plessier A, Gault N, et al. Predictive  
14 Factors of Intestinal Necrosis in Acute Mesenteric Ischemia: Prospective Study  
15 from an Intestinal Stroke Center. *The American Journal of Gastroenterology*.  
16 2017;112(4):597-605.
- 17
- 18 18. Acosta S, Nilsson TK, Björck M. D-dimer testing in patients with suspected acute  
19 thromboembolic occlusion of the superior mesenteric artery. *British Journal of*  
20 *Surgery*. 2004;91(8):991-4.
- 21
- 22 19. Lemma A, Tolonen M, Vikatmaa P, Mentula P, Kantonen I, But A, et al. Editor's  
23 Choice – Epidemiology, Diagnostics, and Outcomes of Acute Occlusive Arterial  
24 Mesenteric Ischaemia: A Population Based Study. *European Journal of Vascular*  
25 *and Endovascular Surgery*. 2022;64(6):646-53.
- 26
- 27 20. Kirkpatrick IDC, Kroeker MA, Greenberg HM. Abbreviations: AMI acute  
28 mesenteric ischemia IMA inferior mesenteric artery SMA superior mesenteric  
29 artery Biphasic CT with Mesenteric CT Angiography in the Evaluation of Acute  
30 Mesenteric Ischemia: Initial Experience 1. *Radiology*. 2003;229:91-8.
- 31
- 32 21. Angelelli G, Scardapane A, Memeo M, Antonio A, Ianora S, Rotondo A. Acute  
33 bowel ischemia: CT findings. *European Journal of Radiology*. 2004;50:37-47.
- 34
- 35 22. Chou CK. CT Manifestations of Bowel Ischemia. *American Journal of*  
36 *Roentgenology*. 2002;178(1):87-91.
- 37
- 38 23. Chou CK, Mak CW, Tzeng WS, Chang JM. CT of small bowel ischemia.  
39 *Abdominal Imaging*. 2004;29(1).
- 40
- 41 24. Florim S, Almeida A, Rocha D, Portugal P. Acute mesenteric ischaemia: a  
42 pictorial review. *Insights into Imaging: Springer Verlag*; 2018. p. 673-82.
- 43
- 44 25. Schellekens DHSM, Grootjans J, Dello SAWG, Van Bijnen AA, Van Dam RM,  
45 Cornelis W, et al. Plasma Intestinal Fatty Acid-Binding Protein Levels Correlate  
46  
47  
48  
49  
50  
51  
52  
53  
54  
55  
56  
57  
58  
59  
60

- 1 With Morphologic Epithelial Intestinal Damage in a Human Translational  
2 Ischemia-reperfusion Model. 2013.
- 3  
4  
5 26. Ceulemans L, De Hertogh G, Farré R, Decuypere J-P, Verbeke L, Jochmans I,  
6 et al. Villin-1 Is a Novel Serological Biomarker for Intestinal Ischemia and  
7 Reperfusion Injury in Rats and Humans. *Transplantation*. 2017;101(6S2).
- 8  
9  
10 27. Schellekens DHSM, Reisinger KW, Lenaerts K, Hadfoune Mh, Olde Damink SW,  
11 Buurman WA, et al. SM22 a Plasma Biomarker for Human Transmural Intestinal  
12 Ischemia. *Annals of surgery*. 2018;268(1):120-6.
- 13  
14  
15 28. Derikx JPM, Schellekens DHSM, Acosta S. Serological markers for human  
16 intestinal ischemia: A systematic review. *Best Practice & Research Clinical  
17 Gastroenterology*. 2017;31(1):69-74.
- 18  
19  
20 29. Pelsers MMAL, Namiot Z, Kisielewski W, Namiot A, Januszkiewicz M, Hermens  
21 WT, et al. Intestinal-type and liver-type fatty acid-binding protein in the intestine.  
22 Tissue distribution and clinical utility. 2003.
- 23  
24  
25 30. Lees-Miller JP, Heeley DH, Smillie LB, Kay CM. Isolation and characterization of  
26 an abundant and novel 22-kDa protein (SM22) from chicken gizzard smooth  
27 muscle. *Journal of Biological Chemistry*. 1987;262(7):2988-93.
- 28  
29  
30 31. Chiavegato A, Roelofs M, Franch R, Castellucci E, Sarinella F, Sartore S.  
31 Differential expression of SM22 isoforms in myofibroblasts and smooth muscle  
32 cells from rabbit bladder. 1999.
- 33  
34  
35 32. Sethi S, Nanda R, Chakraborty T. Clinical Application of Volatile Organic  
36 Compound Analysis for Detecting Infectious Diseases. *Clinical Microbiology  
37 Reviews*. 2013;26(3):462-75.
- 38  
39  
40 33. Van Berkel JJBN, Dallinga JW, Möller GM, Godschalk RWL, Moonen E, Wouters  
41 EFM, et al. Development of accurate classification method based on the analysis  
42 of volatile organic compounds from human exhaled air. *Journal of  
43 Chromatography B*. 2008;861(1):101-7.
- 44  
45  
46 34. Bodelier AGL, Smolinska A, Baranska A, Dallinga JW, Mujagic Z, Vanhees K, et  
47 al. Volatile Organic Compounds in Exhaled Air as Novel Marker for Disease  
48 Activity in Crohn's Disease. *Inflammatory Bowel Diseases*. 2015;21(8):1776-85.
- 49  
50  
51 35. van Wijck K, Wijnands KAP, Meesters DM, Boonen B, van Loon LJC, Buurman  
52 WA, et al. L-citrulline improves splanchnic perfusion and reduces gut injury  
53 during exercise. *Medicine and science in sports and exercise*. 2014;46(11):2039-  
54 46.
- 55  
56  
57  
58  
59  
60

1 36. Castor EDC. Castor Electronic Data Capture 2019 [27 Aug. 2019]. Available  
2  
3 from: <https://castoredc.com>.  
4  
5  
6  
7  
8  
9  
10  
11  
12  
13  
14  
15  
16  
17  
18  
19  
20  
21  
22  
23  
24  
25  
26  
27  
28  
29  
30  
31  
32  
33  
34  
35  
36  
37  
38  
39  
40  
41  
42  
43  
44  
45  
46  
47  
48  
49  
50  
51  
52  
53  
54  
55  
56  
57  
58  
59  
60

For peer review only

**ABBREVIATIONS**

|                   |                                                     |
|-------------------|-----------------------------------------------------|
| <b>AMI:</b>       | Acute Mesenteric Ischemia                           |
| <b>AUC</b>        | Area Under Curve                                    |
| <b>CT(A):</b>     | Computed Tomography (angiography)                   |
| <b>CRF</b>        | Case Report Form                                    |
| <b>EDC</b>        | Electronic Data Capture                             |
| <b>ELISA</b>      | Enzyme-Linked Immunosorbent Assay                   |
| <b>GS-TOF-MS:</b> | Gas chromatography time-of-flight mass spectrometry |
| <b>I-FABP:</b>    | Intestinal Fatty Acid Binding Protein               |
| <b>MLDS:</b>      | Maag Lever Darm Stichting                           |
| <b>PREOP:</b>     | Pre-operative                                       |
| <b>RPF:</b>       | Reperfusion                                         |
| <b>ROC</b>        | Receiver Operating Characteristic                   |
| <b>SM22:</b>      | Smooth Muscle 22                                    |
| <b>VIL-1:</b>     | Villin-1                                            |

1 **VOC:** Volatile Organic Compounds  
2  
3  
4  
5  
6  
7  
8  
9  
10  
11  
12  
13  
14  
15  
16  
17  
18  
19  
20  
21  
22  
23  
24  
25  
26  
27  
28  
29  
30  
31  
32  
33  
34  
35  
36  
37  
38  
39  
40  
41  
42  
43  
44  
45  
46  
47  
48  
49  
50  
51  
52  
53  
54  
55  
56  
57  
58  
59  
60

For peer review only

## FIGURES LEGENDS

Figure 1: Study outline. Patients with a clinical suspicion of acute mesenteric ischemia are considered applicable for participation if all criteria are met. Patients are screened and asked for study participation by informed consent. When consent has been received, study procedures will start. Part 1: blood and exhaled air is collected every 60 minutes (min), up to 180 min (T180) after inclusion; Part 2 is initiated if the patient receives an intervention (endovascular or surgical), with a pre-operative and post-operative sample collection. Patients that do not receive the intervention will directly move into Part 3: Follow-up. Daily samples up to five days (T5) will be retrieved during routine blood collection. In the final stage of the study (Part 4: Diagnosis), each patient will be placed in one of the two study groups (AMI versus non-AMI) based on the collected data. T: time point; PRE: pre-operative; POST: post-operative.

### Inclusion criteria

- The ability to provide informed consent, either by themselves or by a legal representative
- The patients must be suspected of AMI, which is based on the following;
  - Clinical manifestation of the disease
  - The physical examination by the local physician
  - Laboratory measurements
  - Physician's consideration to perform CT(A)-scan

### Exclusion criteria

- Unable to provide informed consent, either by themselves or by a legal representative
- < 18 years of age

Textbox 1: Inclusion and exclusion criteria

Textbox 1: Inclusion and exclusion criteria

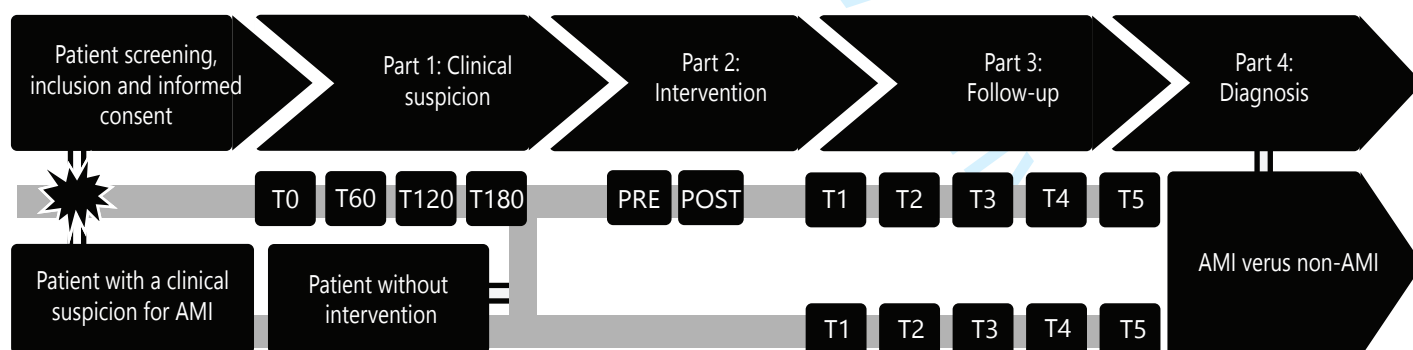

Figure 1: Study Outline

# Reporting checklist for protocol of a clinical trial.

Based on the SPIRIT guidelines.

## Instructions to authors

Complete this checklist by entering the page numbers from your manuscript where readers will find each of the items listed below.

Your article may not currently address all the items on the checklist. Please modify your text to include the missing information. If you are certain that an item does not apply, please write "n/a" and provide a short explanation.

Upload your completed checklist as an extra file when you submit to a journal.

In your methods section, say that you used the SPIRIT reporting guidelines, and cite them as:

Chan A-W, Tetzlaff JM, Gøtzsche PC, Altman DG, Mann H, Berlin J, Dickersin K, Hróbjartsson A, Schulz KF, Parulekar WR, Krleža-Jerić K, Laupacis A, Moher D. SPIRIT 2013 Explanation and Elaboration: Guidance for protocols of clinical trials. *BMJ*. 2013;346:e7586

|                                   |                                                                                                                                 | Page   |
|-----------------------------------|---------------------------------------------------------------------------------------------------------------------------------|--------|
|                                   | Reporting Item                                                                                                                  | Number |
| <b>Administrative information</b> |                                                                                                                                 |        |
| Title                             | <a href="#">#1</a> Descriptive title identifying the study design, population, interventions, and, if applicable, trial acronym | 1      |



|    |                     |                     |                                                            |         |
|----|---------------------|---------------------|------------------------------------------------------------|---------|
| 1  | Trial registration  | <a href="#">#2a</a> | Trial identifier and registry name. If not yet registered, | 5       |
| 2  |                     |                     | name of intended registry                                  |         |
| 3  |                     |                     |                                                            |         |
| 4  |                     |                     |                                                            |         |
| 5  |                     |                     |                                                            |         |
| 6  | Trial registration: | <a href="#">#2b</a> | All items from the World Health Organization Trial         | 5-6     |
| 7  | data set            |                     | Registration Data Set                                      |         |
| 8  |                     |                     |                                                            |         |
| 9  |                     |                     |                                                            |         |
| 10 |                     |                     |                                                            |         |
| 11 | Protocol version    | <a href="#">#3</a>  | Date and version identifier                                | 7       |
| 12 |                     |                     |                                                            |         |
| 13 |                     |                     |                                                            |         |
| 14 |                     |                     |                                                            |         |
| 15 | Funding             | <a href="#">#4</a>  | Sources and types of financial, material, and other        | 5, 17   |
| 16 |                     |                     | support                                                    |         |
| 17 |                     |                     |                                                            |         |
| 18 |                     |                     |                                                            |         |
| 19 |                     |                     |                                                            |         |
| 20 | Roles and           | <a href="#">#5a</a> | Names, affiliations, and roles of protocol contributors    | 1-2, 18 |
| 21 | responsibilities:   |                     |                                                            |         |
| 22 |                     |                     |                                                            |         |
| 23 | contributorship     |                     |                                                            |         |
| 24 |                     |                     |                                                            |         |
| 25 |                     |                     |                                                            |         |
| 26 |                     |                     |                                                            |         |
| 27 |                     |                     |                                                            |         |
| 28 | Roles and           | <a href="#">#5b</a> | Name and contact information for the trial sponsor         | 5       |
| 29 | responsibilities:   |                     |                                                            |         |
| 30 |                     |                     |                                                            |         |
| 31 | sponsor contact     |                     |                                                            |         |
| 32 |                     |                     |                                                            |         |
| 33 | information         |                     |                                                            |         |
| 34 |                     |                     |                                                            |         |
| 35 |                     |                     |                                                            |         |
| 36 |                     |                     |                                                            |         |
| 37 |                     |                     |                                                            |         |
| 38 | Roles and           | <a href="#">#5c</a> | Role of study sponsor and funders, if any, in study        | 17, 18  |
| 39 | responsibilities:   |                     | design; collection, management, analysis, and              |         |
| 40 |                     |                     | interpretation of data; writing of the report; and the     |         |
| 41 | sponsor and funder  |                     | decision to submit the report for publication, including   |         |
| 42 |                     |                     | whether they will have ultimate authority over any of      |         |
| 43 |                     |                     | these activities                                           |         |
| 44 |                     |                     |                                                            |         |
| 45 |                     |                     |                                                            |         |
| 46 |                     |                     |                                                            |         |
| 47 |                     |                     |                                                            |         |
| 48 |                     |                     |                                                            |         |
| 49 |                     |                     |                                                            |         |
| 50 |                     |                     |                                                            |         |
| 51 |                     |                     |                                                            |         |
| 52 | Roles and           | <a href="#">#5d</a> | Composition, roles, and responsibilities of the            | 17, 18  |
| 53 | responsibilities:   |                     | coordinating centre, steering committee, endpoint          |         |
| 54 |                     |                     | adjudication committee, data management team, and          |         |
| 55 | committees          |                     |                                                            |         |
| 56 |                     |                     |                                                            |         |
| 57 |                     |                     |                                                            |         |
| 58 |                     |                     |                                                            |         |
| 59 |                     |                     |                                                            |         |
| 60 |                     |                     |                                                            |         |

other individuals or groups overseeing the trial, if applicable (see Item 21a for data monitoring committee)

## Introduction

|                                                 |                     |                                                                                                                                                                                                            |       |
|-------------------------------------------------|---------------------|------------------------------------------------------------------------------------------------------------------------------------------------------------------------------------------------------------|-------|
| Background and rationale                        | <a href="#">#6a</a> | Description of research question and justification for undertaking the trial, including summary of relevant studies (published and unpublished) examining benefits and harms for each intervention         | 8-10  |
| Background and rationale: choice of comparators | <a href="#">#6b</a> | Explanation for choice of comparators                                                                                                                                                                      | 11-12 |
| Objectives                                      | <a href="#">#7</a>  | Specific objectives or hypotheses                                                                                                                                                                          | 14-15 |
| Trial design                                    | <a href="#">#8</a>  | Description of trial design including type of trial (eg, parallel group, crossover, factorial, single group), allocation ratio, and framework (eg, superiority, equivalence, non-inferiority, exploratory) | 11-15 |
| <b>Methods:</b>                                 |                     |                                                                                                                                                                                                            |       |
| Participants, interventions, and outcomes       |                     |                                                                                                                                                                                                            |       |
| Study setting                                   | <a href="#">#9</a>  | Description of study settings (eg, community clinic, academic hospital) and list of countries where data will be collected. Reference to where list of study sites can be obtained                         | 12    |

|    |                      |                      |                                                              |       |
|----|----------------------|----------------------|--------------------------------------------------------------|-------|
| 1  | Eligibility criteria | <a href="#">#10</a>  | Inclusion and exclusion criteria for participants. If        | 11    |
| 2  |                      |                      |                                                              |       |
| 3  |                      |                      | applicable, eligibility criteria for study centres and       |       |
| 4  |                      |                      | individuals who will perform the interventions (eg,          |       |
| 5  |                      |                      | surgeons, psychotherapists)                                  |       |
| 6  |                      |                      |                                                              |       |
| 7  |                      |                      |                                                              |       |
| 8  |                      |                      |                                                              |       |
| 9  |                      |                      |                                                              |       |
| 10 |                      |                      |                                                              |       |
| 11 | Interventions:       | <a href="#">#11a</a> | Interventions for each group with sufficient detail to allow | 13-14 |
| 12 |                      |                      |                                                              |       |
| 13 | description          |                      | replication, including how and when they will be             |       |
| 14 |                      |                      | administered                                                 |       |
| 15 |                      |                      |                                                              |       |
| 16 |                      |                      |                                                              |       |
| 17 |                      |                      |                                                              |       |
| 18 |                      |                      |                                                              |       |
| 19 | Interventions:       | <a href="#">#11b</a> | Criteria for discontinuing or modifying allocated            | 16    |
| 20 |                      |                      |                                                              |       |
| 21 | modifications        |                      | interventions for a given trial participant (eg, drug dose   |       |
| 22 |                      |                      | change in response to harms, participant request, or         |       |
| 23 |                      |                      | improving / worsening disease)                               |       |
| 24 |                      |                      |                                                              |       |
| 25 |                      |                      |                                                              |       |
| 26 |                      |                      |                                                              |       |
| 27 |                      |                      |                                                              |       |
| 28 |                      |                      |                                                              |       |
| 29 | Interventions:       | <a href="#">#11c</a> | Strategies to improve adherence to intervention protocols,   | 16    |
| 30 |                      |                      |                                                              |       |
| 31 | adherence            |                      | and any procedures for monitoring adherence (eg, drug        |       |
| 32 |                      |                      | tablet return; laboratory tests)                             |       |
| 33 |                      |                      |                                                              |       |
| 34 |                      |                      |                                                              |       |
| 35 |                      |                      |                                                              |       |
| 36 | Interventions:       | <a href="#">#11d</a> | Relevant concomitant care and interventions that are         | -     |
| 37 |                      |                      |                                                              |       |
| 38 | concomitant care     |                      | permitted or prohibited during the trial                     |       |
| 39 |                      |                      |                                                              |       |
| 40 |                      |                      |                                                              |       |
| 41 |                      |                      |                                                              |       |
| 42 | Outcomes             | <a href="#">#12</a>  | Primary, secondary, and other outcomes, including the        | 14-15 |
| 43 |                      |                      | specific measurement variable (eg, systolic blood            |       |
| 44 |                      |                      | pressure), analysis metric (eg, change from baseline, final  |       |
| 45 |                      |                      | value, time to event), method of aggregation (eg, median,    |       |
| 46 |                      |                      | proportion), and time point for each outcome. Explanation    |       |
| 47 |                      |                      | of the clinical relevance of chosen efficacy and harm        |       |
| 48 |                      |                      | outcomes is strongly recommended                             |       |
| 49 |                      |                      |                                                              |       |
| 50 |                      |                      |                                                              |       |
| 51 |                      |                      |                                                              |       |
| 52 |                      |                      |                                                              |       |
| 53 |                      |                      |                                                              |       |
| 54 |                      |                      |                                                              |       |
| 55 |                      |                      |                                                              |       |
| 56 |                      |                      |                                                              |       |
| 57 |                      |                      |                                                              |       |
| 58 |                      |                      |                                                              |       |
| 59 |                      |                      |                                                              |       |
| 60 |                      |                      |                                                              |       |

|    |                           |                      |                                                            |       |
|----|---------------------------|----------------------|------------------------------------------------------------|-------|
| 1  | Participant timeline      | <a href="#">#13</a>  | Time schedule of enrolment, interventions (including any   | 12-13 |
| 2  |                           |                      | run-ins and washouts), assessments, and visits for         |       |
| 3  |                           |                      | participants. A schematic diagram is highly recommended    |       |
| 4  |                           |                      | (see Figure)                                               |       |
| 5  |                           |                      |                                                            |       |
| 6  |                           |                      |                                                            |       |
| 7  |                           |                      |                                                            |       |
| 8  |                           |                      |                                                            |       |
| 9  |                           |                      |                                                            |       |
| 10 |                           |                      |                                                            |       |
| 11 | Sample size               | <a href="#">#14</a>  | Estimated number of participants needed to achieve         | 16    |
| 12 |                           |                      | study objectives and how it was determined, including      |       |
| 13 |                           |                      | clinical and statistical assumptions supporting any sample |       |
| 14 |                           |                      | size calculations                                          |       |
| 15 |                           |                      |                                                            |       |
| 16 |                           |                      |                                                            |       |
| 17 |                           |                      |                                                            |       |
| 18 |                           |                      |                                                            |       |
| 19 |                           |                      |                                                            |       |
| 20 |                           |                      |                                                            |       |
| 21 | Recruitment               | <a href="#">#15</a>  | Strategies for achieving adequate participant enrolment to | 11-12 |
| 22 |                           |                      | reach target sample size                                   |       |
| 23 |                           |                      |                                                            |       |
| 24 |                           |                      |                                                            |       |
| 25 |                           |                      |                                                            |       |
| 26 | <b>Methods:</b>           |                      |                                                            |       |
| 27 |                           |                      |                                                            |       |
| 28 | <b>Assignment of</b>      |                      |                                                            |       |
| 29 | <b>interventions (for</b> |                      |                                                            |       |
| 30 | <b>controlled trials)</b> |                      |                                                            |       |
| 31 |                           |                      |                                                            |       |
| 32 |                           |                      |                                                            |       |
| 33 |                           |                      |                                                            |       |
| 34 |                           |                      |                                                            |       |
| 35 |                           |                      |                                                            |       |
| 36 | Allocation: sequence      | <a href="#">#16a</a> | Method of generating the allocation sequence (eg,          | N.A.  |
| 37 | generation                |                      | computer-generated random numbers), and list of any        |       |
| 38 |                           |                      | factors for stratification. To reduce predictability of a  |       |
| 39 |                           |                      | random sequence, details of any planned restriction (eg,   |       |
| 40 |                           |                      | blocking) should be provided in a separate document that   |       |
| 41 |                           |                      | is unavailable to those who enrol participants or assign   |       |
| 42 |                           |                      | interventions                                              |       |
| 43 |                           |                      |                                                            |       |
| 44 |                           |                      |                                                            |       |
| 45 |                           |                      |                                                            |       |
| 46 |                           |                      |                                                            |       |
| 47 |                           |                      |                                                            |       |
| 48 |                           |                      |                                                            |       |
| 49 |                           |                      |                                                            |       |
| 50 |                           |                      |                                                            |       |
| 51 |                           |                      |                                                            |       |
| 52 |                           |                      |                                                            |       |
| 53 | Allocation                | <a href="#">#16b</a> | Mechanism of implementing the allocation sequence (eg,     |       |
| 54 | concealment               |                      | central telephone; sequentially numbered, opaque,          |       |
| 55 |                           |                      |                                                            |       |
| 56 |                           |                      |                                                            |       |
| 57 |                           |                      |                                                            |       |
| 58 | mechanism                 |                      |                                                            |       |
| 59 |                           |                      |                                                            |       |
| 60 |                           |                      |                                                            |       |

sealed envelopes), describing any steps to conceal the sequence until interventions are assigned

Allocation: [#16c](#) Who will generate the allocation sequence, who will enrol participants, and who will assign participants to interventions N.A.

Blinding (masking) [#17a](#) Who will be blinded after assignment to interventions (eg, trial participants, care providers, outcome assessors, data analysts), and how N.A.

Blinding (masking): [#17b](#) If blinded, circumstances under which unblinding is permissible, and procedure for revealing a participant's allocated intervention during the trial N.A.

## Methods: Data

collection,

management, and

analysis

Data collection plan [#18a](#) Plans for assessment and collection of outcome, baseline, and other trial data, including any related processes to promote data quality (eg, duplicate measurements, training of assessors) and a description of study instruments (eg, questionnaires, laboratory tests) along with their reliability and validity, if known. Reference to where data collection forms can be found, if not in the protocol 14-15

|    |                            |                      |                                                                |       |
|----|----------------------------|----------------------|----------------------------------------------------------------|-------|
| 1  | Data collection plan:      | <a href="#">#18b</a> | Plans to promote participant retention and complete            | 14-15 |
| 2  |                            |                      |                                                                |       |
| 3  | retention                  |                      | follow-up, including list of any outcome data to be            |       |
| 4  |                            |                      | collected for participants who discontinue or deviate from     |       |
| 5  |                            |                      | intervention protocols                                         |       |
| 6  |                            |                      |                                                                |       |
| 7  |                            |                      |                                                                |       |
| 8  |                            |                      |                                                                |       |
| 9  |                            |                      |                                                                |       |
| 10 |                            |                      |                                                                |       |
| 11 | Data management            | <a href="#">#19</a>  | Plans for data entry, coding, security, and storage,           | 14-15 |
| 12 |                            |                      | including any related processes to promote data quality        |       |
| 13 |                            |                      | (eg, double data entry; range checks for data values).         |       |
| 14 |                            |                      | Reference to where details of data management                  |       |
| 15 |                            |                      | procedures can be found, if not in the protocol                |       |
| 16 |                            |                      |                                                                |       |
| 17 |                            |                      |                                                                |       |
| 18 | Statistics: outcomes       | <a href="#">#20a</a> | Statistical methods for analysing primary and secondary        | 14-16 |
| 19 |                            |                      | outcomes. Reference to where other details of the              |       |
| 20 |                            |                      | statistical analysis plan can be found, if not in the protocol |       |
| 21 |                            |                      |                                                                |       |
| 22 |                            |                      |                                                                |       |
| 23 | Statistics: additional     | <a href="#">#20b</a> | Methods for any additional analyses (eg, subgroup and          | 15-16 |
| 24 | analyses                   |                      | adjusted analyses)                                             |       |
| 25 |                            |                      |                                                                |       |
| 26 |                            |                      |                                                                |       |
| 27 |                            |                      |                                                                |       |
| 28 |                            |                      |                                                                |       |
| 29 |                            |                      |                                                                |       |
| 30 |                            |                      |                                                                |       |
| 31 | Statistics: analysis       | <a href="#">#20c</a> | Definition of analysis population relating to protocol non-    | 15-16 |
| 32 | population and             |                      | adherence (eg, as randomised analysis), and any                |       |
| 33 | missing data               |                      | statistical methods to handle missing data (eg, multiple       |       |
| 34 |                            |                      | imputation)                                                    |       |
| 35 |                            |                      |                                                                |       |
| 36 |                            |                      |                                                                |       |
| 37 |                            |                      |                                                                |       |
| 38 |                            |                      |                                                                |       |
| 39 |                            |                      |                                                                |       |
| 40 |                            |                      |                                                                |       |
| 41 |                            |                      |                                                                |       |
| 42 |                            |                      |                                                                |       |
| 43 |                            |                      |                                                                |       |
| 44 |                            |                      |                                                                |       |
| 45 |                            |                      |                                                                |       |
| 46 | <b>Methods: Monitoring</b> |                      |                                                                |       |
| 47 |                            |                      |                                                                |       |
| 48 |                            |                      |                                                                |       |
| 49 | Data monitoring:           | <a href="#">#21a</a> | Composition of data monitoring committee (DMC);                | 15-16 |
| 50 | formal committee           |                      | summary of its role and reporting structure; statement of      |       |
| 51 |                            |                      | whether it is independent from the sponsor and                 |       |
| 52 |                            |                      | competing interests; and reference to where further            |       |
| 53 |                            |                      |                                                                |       |
| 54 |                            |                      |                                                                |       |
| 55 |                            |                      |                                                                |       |
| 56 |                            |                      |                                                                |       |
| 57 |                            |                      |                                                                |       |
| 58 |                            |                      |                                                                |       |
| 59 |                            |                      |                                                                |       |
| 60 |                            |                      |                                                                |       |

1 details about its charter can be found, if not in the  
 2 protocol. Alternatively, an explanation of why a DMC is  
 3 not needed  
 4  
 5  
 6  
 7

|    |                      |                      |                                                              |       |
|----|----------------------|----------------------|--------------------------------------------------------------|-------|
| 8  | Data monitoring:     | <a href="#">#21b</a> | Description of any interim analyses and stopping             | 15-16 |
| 9  | interim analysis     |                      | guidelines, including who will have access to these          |       |
| 10 |                      |                      | interim results and make the final decision to terminate     |       |
| 11 |                      |                      | the trial                                                    |       |
| 12 |                      |                      |                                                              |       |
| 13 |                      |                      |                                                              |       |
| 14 |                      |                      |                                                              |       |
| 15 |                      |                      |                                                              |       |
| 16 |                      |                      |                                                              |       |
| 17 |                      |                      |                                                              |       |
| 18 | Harms                | <a href="#">#22</a>  | Plans for collecting, assessing, reporting, and managing     | 15-16 |
| 19 |                      |                      | solicited and spontaneously reported adverse events and      |       |
| 20 |                      |                      | other unintended effects of trial interventions or trial     |       |
| 21 |                      |                      | conduct                                                      |       |
| 22 |                      |                      |                                                              |       |
| 23 |                      |                      |                                                              |       |
| 24 |                      |                      |                                                              |       |
| 25 |                      |                      |                                                              |       |
| 26 |                      |                      |                                                              |       |
| 27 |                      |                      |                                                              |       |
| 28 | Auditing             | <a href="#">#23</a>  | Frequency and procedures for auditing trial conduct, if      | 15-16 |
| 29 |                      |                      | any, and whether the process will be independent from        |       |
| 30 |                      |                      | investigators and the sponsor                                |       |
| 31 |                      |                      |                                                              |       |
| 32 |                      |                      |                                                              |       |
| 33 |                      |                      |                                                              |       |
| 34 |                      |                      |                                                              |       |
| 35 | <b>Ethics and</b>    |                      |                                                              |       |
| 36 | <b>dissemination</b> |                      |                                                              |       |
| 37 |                      |                      |                                                              |       |
| 38 |                      |                      |                                                              |       |
| 39 |                      |                      |                                                              |       |
| 40 |                      |                      |                                                              |       |
| 41 | Research ethics      | <a href="#">#24</a>  | Plans for seeking research ethics committee / institutional  | 17-18 |
| 42 | approval             |                      | review board (REC / IRB) approval                            |       |
| 43 |                      |                      |                                                              |       |
| 44 |                      |                      |                                                              |       |
| 45 |                      |                      |                                                              |       |
| 46 | Protocol             | <a href="#">#25</a>  | Plans for communicating important protocol modifications     | 5-6   |
| 47 | amendments           |                      | (eg, changes to eligibility criteria, outcomes, analyses) to |       |
| 48 |                      |                      | relevant parties (eg, investigators, REC / IRBs, trial       |       |
| 49 |                      |                      | participants, trial registries, journals, regulators)        |       |
| 50 |                      |                      |                                                              |       |
| 51 |                      |                      |                                                              |       |
| 52 |                      |                      |                                                              |       |
| 53 |                      |                      |                                                              |       |
| 54 |                      |                      |                                                              |       |
| 55 |                      |                      |                                                              |       |
| 56 |                      |                      |                                                              |       |
| 57 |                      |                      |                                                              |       |
| 58 |                      |                      |                                                              |       |
| 59 |                      |                      |                                                              |       |
| 60 |                      |                      |                                                              |       |

|    |                       |                      |                                                                |        |
|----|-----------------------|----------------------|----------------------------------------------------------------|--------|
| 1  | Consent or assent     | <a href="#">#26a</a> | Who will obtain informed consent or assent from potential      | 11-13, |
| 2  |                       |                      | trial participants or authorised surrogates, and how (see      | 16     |
| 3  |                       |                      |                                                                |        |
| 4  |                       |                      | Item 32)                                                       |        |
| 5  |                       |                      |                                                                |        |
| 6  |                       |                      |                                                                |        |
| 7  |                       |                      |                                                                |        |
| 8  |                       |                      |                                                                |        |
| 9  | Consent or assent:    | <a href="#">#26b</a> | Additional consent provisions for collection and use of        | N.A.   |
| 10 |                       |                      | participant data and biological specimens in ancillary         |        |
| 11 | ancillary studies     |                      | studies, if applicable                                         |        |
| 12 |                       |                      |                                                                |        |
| 13 |                       |                      |                                                                |        |
| 14 |                       |                      |                                                                |        |
| 15 |                       |                      |                                                                |        |
| 16 | Confidentiality       | <a href="#">#27</a>  | How personal information about potential and enrolled          | 15     |
| 17 |                       |                      | participants will be collected, shared, and maintained in      |        |
| 18 |                       |                      | order to protect confidentiality before, during, and after     |        |
| 19 |                       |                      | the trial                                                      |        |
| 20 |                       |                      |                                                                |        |
| 21 |                       |                      |                                                                |        |
| 22 |                       |                      |                                                                |        |
| 23 |                       |                      |                                                                |        |
| 24 |                       |                      |                                                                |        |
| 25 |                       |                      |                                                                |        |
| 26 | Declaration of        | <a href="#">#28</a>  | Financial and other competing interests for principal          | N.A.   |
| 27 |                       |                      | investigators for the overall trial and each study site        |        |
| 28 | interests             |                      |                                                                |        |
| 29 |                       |                      |                                                                |        |
| 30 |                       |                      |                                                                |        |
| 31 |                       |                      |                                                                |        |
| 32 | Data access           | <a href="#">#29</a>  | Statement of who will have access to the final trial           | 15     |
| 33 |                       |                      | dataset, and disclosure of contractual agreements that         |        |
| 34 |                       |                      | limit such access for investigators                            |        |
| 35 |                       |                      |                                                                |        |
| 36 |                       |                      |                                                                |        |
| 37 |                       |                      |                                                                |        |
| 38 |                       |                      |                                                                |        |
| 39 | Ancillary and post    | <a href="#">#30</a>  | Provisions, if any, for ancillary and post-trial care, and for | N.A.   |
| 40 |                       |                      | compensation to those who suffer harm from trial               |        |
| 41 | trial care            |                      | participation                                                  |        |
| 42 |                       |                      |                                                                |        |
| 43 |                       |                      |                                                                |        |
| 44 |                       |                      |                                                                |        |
| 45 |                       |                      |                                                                |        |
| 46 |                       |                      |                                                                |        |
| 47 | Dissemination policy: | <a href="#">#31a</a> | Plans for investigators and sponsor to communicate trial       | N.A.   |
| 48 |                       |                      | results to participants, healthcare professionals, the         |        |
| 49 | trial results         |                      | public, and other relevant groups (eg, via publication,        |        |
| 50 |                       |                      | reporting in results databases, or other data sharing          |        |
| 51 |                       |                      | arrangements), including any publication restrictions          |        |
| 52 |                       |                      |                                                                |        |
| 53 |                       |                      |                                                                |        |
| 54 |                       |                      |                                                                |        |
| 55 |                       |                      |                                                                |        |
| 56 |                       |                      |                                                                |        |
| 57 |                       |                      |                                                                |        |
| 58 |                       |                      |                                                                |        |
| 59 |                       |                      |                                                                |        |
| 60 |                       |                      |                                                                |        |



1 Dissemination policy: [#31b](#) Authorship eligibility guidelines and any intended use of 17-18  
2  
3 authorship professional writers  
4  
5

6 Dissemination policy: [#31c](#) Plans, if any, for granting public access to the full N.A.  
7  
8 reproducible protocol, participant-level dataset, and statistical code  
9  
10 research  
11  
12

## 13 Appendices

14  
15  
16  
17 Informed consent [#32](#) Model consent form and other related documentation  
18  
19 materials given to participants and authorised surrogates  
20  
21

22  
23 Biological specimens [#33](#) Plans for collection, laboratory evaluation, and storage of N.A.  
24  
25 biological specimens for genetic or molecular analysis in  
26  
27 the current trial and for future use in ancillary studies, if  
28  
29 applicable  
30  
31

32  
33 None The SPIRIT Explanation and Elaboration paper is distributed under the terms of the Creative  
34  
35 Commons Attribution License CC-BY-NC. This checklist can be completed online using  
36  
37 <https://www.goodreports.org/>, a tool made by the [EQUATOR Network](#) in collaboration with  
38  
39 [Penelope.ai](#)  
40  
41  
42  
43  
44  
45  
46  
47  
48  
49  
50  
51  
52  
53  
54  
55  
56  
57  
58  
59  
60

| Section & Topic          | No  | Item                                                                                                                                                   | Reported on page # |
|--------------------------|-----|--------------------------------------------------------------------------------------------------------------------------------------------------------|--------------------|
| <b>TITLE OR ABSTRACT</b> |     |                                                                                                                                                        |                    |
|                          | 1   | Identification as a study of diagnostic accuracy using at least one measure of accuracy (such as sensitivity, specificity, predictive values, or AUC)  | 1, 4               |
| <b>ABSTRACT</b>          |     |                                                                                                                                                        |                    |
|                          | 2   | Structured summary of study design, methods, results, and conclusions (for specific guidance, see STARD for Abstracts)                                 | 4-5                |
| <b>INTRODUCTION</b>      |     |                                                                                                                                                        |                    |
|                          | 3   | Scientific and clinical background, including the intended use and clinical role of the index test                                                     | 8-10               |
|                          | 4   | Study objectives and hypotheses                                                                                                                        | 11-12              |
| <b>METHODS</b>           |     |                                                                                                                                                        |                    |
| <i>Study design</i>      | 5   | Whether data collection was planned before the index test and reference standard were performed (prospective study) or after (retrospective study)     | 11-12              |
| <i>Participants</i>      | 6   | Eligibility criteria                                                                                                                                   | 11                 |
|                          | 7   | On what basis potentially eligible participants were identified (such as symptoms, results from previous tests, inclusion in registry)                 | 11-12              |
|                          | 8   | Where and when potentially eligible participants were identified (setting, location and dates)                                                         | 11-12              |
|                          | 9   | Whether participants formed a consecutive, random or convenience series                                                                                | 11-12              |
| <i>Test methods</i>      | 10a | Index test, in sufficient detail to allow replication                                                                                                  | 11-13              |
|                          | 10b | Reference standard, in sufficient detail to allow replication                                                                                          | 11-13              |
|                          | 11  | Rationale for choosing the reference standard (if alternatives exist)                                                                                  | 11-13              |
|                          | 12a | Definition of and rationale for test positivity cut-offs or result categories of the index test, distinguishing pre-specified from exploratory         | 11-13              |
|                          | 12b | Definition of and rationale for test positivity cut-offs or result categories of the reference standard, distinguishing pre-specified from exploratory | 11-13              |
|                          | 13a | Whether clinical information and reference standard results were available to the performers/readers of the index test                                 | 11-13              |
|                          | 13b | Whether clinical information and index test results were available to the assessors of the reference standard                                          | 11-13              |
| <i>Analysis</i>          | 14  | Methods for estimating or comparing measures of diagnostic accuracy                                                                                    | 13-17              |
|                          | 15  | How indeterminate index test or reference standard results were handled                                                                                | 16-17              |
|                          | 16  | How missing data on the index test and reference standard were handled                                                                                 | 16-17              |
|                          | 17  | Any analyses of variability in diagnostic accuracy, distinguishing pre-specified from exploratory                                                      | 16-17              |
|                          | 18  | Intended sample size and how it was determined                                                                                                         | 16-17              |
| <b>RESULTS</b>           |     |                                                                                                                                                        |                    |
| <i>Participants</i>      | 19  | Flow of participants, using a diagram                                                                                                                  | 11                 |
|                          | 20  | Baseline demographic and clinical characteristics of participants                                                                                      | 12                 |
|                          | 21a | Distribution of severity of disease in those with the target condition                                                                                 | 8-10, 16           |
|                          | 21b | Distribution of alternative diagnoses in those without the target condition                                                                            | 8-10, 16           |
|                          | 22  | Time interval and any clinical interventions between index test and reference standard                                                                 | N.A.               |
| <i>Test results</i>      | 23  | Cross tabulation of the index test results (or their distribution) by the results of the reference standard                                            | N.A.               |
|                          | 24  | Estimates of diagnostic accuracy and their precision (such as 95% confidence intervals)                                                                | 16-17              |
|                          | 25  | Any adverse events from performing the index test or the reference standard                                                                            | 16                 |
| <b>DISCUSSION</b>        |     |                                                                                                                                                        |                    |
|                          | 26  | Study limitations, including sources of potential bias, statistical uncertainty, and generalisability                                                  | 7                  |
|                          | 27  | Implications for practice, including the intended use and clinical role of the index test                                                              | 7-10               |
| <b>OTHER INFORMATION</b> |     |                                                                                                                                                        |                    |
|                          | 28  | Registration number and name of registry                                                                                                               | 5-7                |
|                          | 29  | Where the full study protocol can be accessed                                                                                                          | 5-7                |
|                          | 30  | Sources of funding and other support; role of funders                                                                                                  | 5-7                |

# STARD 2015

---

## AIM

STARD stands for “Standards for Reporting Diagnostic accuracy studies”. This list of items was developed to contribute to the completeness and transparency of reporting of diagnostic accuracy studies. Authors can use the list to write informative study reports. Editors and peer-reviewers can use it to evaluate whether the information has been included in manuscripts submitted for publication.

---

## EXPLANATION

A **diagnostic accuracy study** evaluates the ability of one or more medical tests to correctly classify study participants as having a **target condition**. This can be a disease, a disease stage, response or benefit from therapy, or an event or condition in the future. A medical test can be an imaging procedure, a laboratory test, elements from history and physical examination, a combination of these, or any other method for collecting information about the current health status of a patient.

The test whose accuracy is evaluated is called **index test**. A study can evaluate the accuracy of one or more index tests. Evaluating the ability of a medical test to correctly classify patients is typically done by comparing the distribution of the index test results with those of the **reference standard**. The reference standard is the best available method for establishing the presence or absence of the target condition. An accuracy study can rely on one or more reference standards.

If test results are categorized as either positive or negative, the cross tabulation of the index test results against those of the reference standard can be used to estimate the **sensitivity** of the index test (the proportion of participants *with* the target condition who have a positive index test), and its **specificity** (the proportion *without* the target condition who have a negative index test). From this cross tabulation (sometimes referred to as the contingency or “2x2” table), several other accuracy statistics can be estimated, such as the positive and negative **predictive values** of the test. Confidence intervals around estimates of accuracy can then be calculated to quantify the statistical **precision** of the measurements.

If the index test results can take more than two values, categorization of test results as positive or negative requires a **test positivity cut-off**. When multiple such cut-offs can be defined, authors can report a receiver operating characteristic (ROC) curve which graphically represents the combination of sensitivity and specificity for each possible test positivity cut-off. The **area under the ROC curve** informs in a single numerical value about the overall diagnostic accuracy of the index test.

The **intended use** of a medical test can be diagnosis, screening, staging, monitoring, surveillance, prediction or prognosis. The **clinical role** of a test explains its position relative to existing tests in the clinical pathway. A replacement test, for example, replaces an existing test. A triage test is used before an existing test; an add-on test is used after an existing test.

Besides diagnostic accuracy, several other outcomes and statistics may be relevant in the evaluation of medical tests. Medical tests can also be used to classify patients for purposes other than diagnosis, such as staging or prognosis. The STARD list was not explicitly developed for these other outcomes, statistics, and study types, although most STARD items would still apply.

---

## DEVELOPMENT

This STARD list was released in 2015. The 30 items were identified by an international expert group of methodologists, researchers, and editors. The guiding principle in the development of STARD was to select items that, when reported, would help readers to judge the potential for bias in the study, to appraise the applicability of the study findings and the validity of conclusions and recommendations. The list represents an update of the first version, which was published in 2003.

More information can be found on <http://www.equator-network.org/reporting-guidelines/stard>.

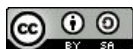

# BMJ Open

## Diagnostic Potential of Plasma Biomarkers and Exhaled Volatile Organic Compounds in Predicting the Different Stages of Acute Mesenteric Ischemia: Protocol for a Multicentre Prospective Observational Study (TACTIC study)

|                                 |                                                                                                                                                                                                                                                                                                                                                                                                                                                                                                                                                                                                                                                                                                                                                                                                                                                                                                                                                                                                                                                                                                                                                                                                                                                                                                                                                                                                                                                                                                                                                                                                                                                                                                                               |
|---------------------------------|-------------------------------------------------------------------------------------------------------------------------------------------------------------------------------------------------------------------------------------------------------------------------------------------------------------------------------------------------------------------------------------------------------------------------------------------------------------------------------------------------------------------------------------------------------------------------------------------------------------------------------------------------------------------------------------------------------------------------------------------------------------------------------------------------------------------------------------------------------------------------------------------------------------------------------------------------------------------------------------------------------------------------------------------------------------------------------------------------------------------------------------------------------------------------------------------------------------------------------------------------------------------------------------------------------------------------------------------------------------------------------------------------------------------------------------------------------------------------------------------------------------------------------------------------------------------------------------------------------------------------------------------------------------------------------------------------------------------------------|
| Journal:                        | <i>BMJ Open</i>                                                                                                                                                                                                                                                                                                                                                                                                                                                                                                                                                                                                                                                                                                                                                                                                                                                                                                                                                                                                                                                                                                                                                                                                                                                                                                                                                                                                                                                                                                                                                                                                                                                                                                               |
| Manuscript ID                   | bmjopen-2023-072875.R1                                                                                                                                                                                                                                                                                                                                                                                                                                                                                                                                                                                                                                                                                                                                                                                                                                                                                                                                                                                                                                                                                                                                                                                                                                                                                                                                                                                                                                                                                                                                                                                                                                                                                                        |
| Article Type:                   | Protocol                                                                                                                                                                                                                                                                                                                                                                                                                                                                                                                                                                                                                                                                                                                                                                                                                                                                                                                                                                                                                                                                                                                                                                                                                                                                                                                                                                                                                                                                                                                                                                                                                                                                                                                      |
| Date Submitted by the Author:   | 16-May-2023                                                                                                                                                                                                                                                                                                                                                                                                                                                                                                                                                                                                                                                                                                                                                                                                                                                                                                                                                                                                                                                                                                                                                                                                                                                                                                                                                                                                                                                                                                                                                                                                                                                                                                                   |
| Complete List of Authors:       | Duivenvoorden, Annet; Maastricht University, Department of Surgery, NUTRIM School of Nutrition and Translational Research in Metabolism Clarysse, Mathias; KU Leuven, Abdominal Transplant Laboratory, Department of Microbiology, Immunology and Transplantation; KU Leuven University Hospitals Leuven, Department of Abdominal Transplant Surgery and Transplant Coordination Ceulemans, Laurens; KU Leuven University Hospitals Leuven, Leuven Intestinal Failure and Transplantation Center (LIFT); KU Leuven University Hospitals Leuven, Laboratory of Respiratory Diseases and Thoracic Surgery (BREATHE), Department of Thoracic Surgery Geelkerken, Robert H.; Medisch Spectrum Twente, Vascular Surgery; University of Twente, TechMed Centre Derikx, Joep; Amsterdam UMC Location AMC, Department of Pediatric Surgery, Amsterdam Reproduction and Development Research Institute de Vries, Jean-Paul; University of Groningen, Department of Surgery Buscher, Hessel; Gelre Ziekenhuizen, Department of Surgery Damink, S. ; Maastricht University, Department of Surgery, NUTRIM School of Nutrition and Translational Research in Metabolism; RWTH Aachen University, Department of General, Visceral and Transplantation Surgery, University Hospital van Schooten, Frederik; Maastricht University, Department of Pharmacology and Toxicology, NUTRIM School of Nutrition and Translational Research in Metabolism Lubbers, Tim ; Maastricht University Medical Centre+, Department of Surgery and GROW School for Oncology and Developmental Biology Lenaerts, K.; Maastricht University, Department of Surgery DMIS, Dutch Mesenteric Ischemia Study group; Medisch Spectrum Twente, Department of Surgery |
| <b>Primary Subject Heading</b>: | Diagnostics                                                                                                                                                                                                                                                                                                                                                                                                                                                                                                                                                                                                                                                                                                                                                                                                                                                                                                                                                                                                                                                                                                                                                                                                                                                                                                                                                                                                                                                                                                                                                                                                                                                                                                                   |
| Secondary Subject Heading:      | Diagnostics, Gastroenterology and hepatology, Research methods                                                                                                                                                                                                                                                                                                                                                                                                                                                                                                                                                                                                                                                                                                                                                                                                                                                                                                                                                                                                                                                                                                                                                                                                                                                                                                                                                                                                                                                                                                                                                                                                                                                                |
| Keywords:                       | SURGERY, GASTROENTEROLOGY, INTENSIVE & CRITICAL CARE                                                                                                                                                                                                                                                                                                                                                                                                                                                                                                                                                                                                                                                                                                                                                                                                                                                                                                                                                                                                                                                                                                                                                                                                                                                                                                                                                                                                                                                                                                                                                                                                                                                                          |
|                                 |                                                                                                                                                                                                                                                                                                                                                                                                                                                                                                                                                                                                                                                                                                                                                                                                                                                                                                                                                                                                                                                                                                                                                                                                                                                                                                                                                                                                                                                                                                                                                                                                                                                                                                                               |

1  
2  
3  
4  
5  
6  
7  
8  
9  
10  
11  
12  
13  
14  
15  
16  
17  
18  
19  
20  
21  
22  
23  
24  
25  
26  
27  
28  
29  
30  
31  
32  
33  
34  
35  
36  
37  
38  
39  
40  
41  
42  
43  
44  
45  
46  
47  
48  
49  
50  
51  
52  
53  
54  
55  
56  
57  
58  
59  
60



1  
2  
3  
4  
5  
6  
7  
8  
9  
10  
11  
12  
13  
14  
15  
16  
17  
18  
19  
20  
21  
22  
23  
24  
25  
26  
27  
28  
29  
30  
31  
32  
33  
34  
35  
36  
37  
38  
39  
40  
41  
42  
43  
44  
45  
46  
47  
48  
49  
50  
51  
52  
53  
54  
55  
56  
57  
58  
59  
60

# Diagnostic Potential of Plasma Biomarkers and Exhaled Volatile Organic Compounds in Predicting the Different Stages of Acute Mesenteric Ischemia: ~~Study~~ Protocol for a Multicentre Prospective Observational Study (TACTIC study)

A.A.M. Duivenvoorden<sup>1</sup>, M. Clarysse<sup>2,3</sup>, L.J. Ceulemans<sup>4,5</sup>, R.H. Geelkerken<sup>6,7</sup>, J.P.M. Derikx<sup>8</sup>, J.P.P.M. de Vries<sup>9</sup>, H.C.J.L. Buscher<sup>10</sup>, S.W.M. Olde Damink<sup>1,11</sup>, F.J. van Schooten<sup>12</sup>, T. Lubbers<sup>13</sup>, K. Lenaerts<sup>1</sup>, Dutch Mesenteric Ischemia Study (DMIS) group\*

1. Department of Surgery, NUTRIM School of Nutrition and Translational Research in Metabolism, Maastricht University, Maastricht, the Netherlands
2. Abdominal Transplant Laboratory, Department of Microbiology, Immunology and Transplantation, KU Leuven, Leuven, Belgium.
3. Department of Abdominal Transplant Surgery and Transplant Coordination, University Hospitals Leuven, Leuven, Belgium.
4. Leuven Intestinal Failure and Transplantation Center (LIFT), University Hospitals Leuven, Leuven, Belgium.
5. Laboratory of Respiratory Diseases and Thoracic Surgery (BREATHE), Department of Thoracic Surgery, University Hospitals Leuven, Leuven, Belgium.

- 1 6. Multi-Modality Medical Imaging Group, TechMed Centre, University of Twente,  
2  
3  
4 Enschede, The Netherlands
- 5  
6 7. Department of Vascular Surgery, Medisch Spectrum Twente, Enschede, The  
7  
8  
9 Netherlands
- 10  
11 8. Amsterdam UMC Location AMC, Department of Pediatric Surgery, Amsterdam  
12  
13  
14  
15  
16  
17  
18  
19  
20  
21  
22  
23  
24  
25  
26  
27  
28  
29  
30  
31  
32  
33  
34  
35  
36  
37  
38  
39  
40  
41  
42  
43  
44  
45  
46  
47  
48  
49  
50  
51  
52  
53  
54  
55  
56  
57  
58  
59  
60  
10. Department of Surgery, Gelre Ziekenhuizen, Apeldoorn, The Netherlands
11. Department of General, Visceral and Transplantation Surgery, University  
Hospital RWTH Aachen, Aachen, Germany
12. Department of Pharmacology and Toxicology, NUTRIM School of Nutrition and  
Translational Research in Metabolism, Maastricht University, Maastricht, The  
Netherlands
13. Department of Surgery, Maastricht University Medical Centre+, Maastricht, the  
Netherlands and GROW School for Oncology and Developmental Biology,  
Maastricht University, Maastricht, The Netherlands

#### \* Collaborators

*Dutch Mesenteric Ischemia Study (DMIS) group:* Ron Balm, Gert Jan de Borst, Juliette T Blauw, Marco J Bruno, Olaf J Bakker, Louisa J D van Dijk, Hessel C J L Buscher, Bram Fioole, Robert H Geelkerken, Jaap F Hamming, Jihan Harki, Daniel A F van den Heuvel, Eline S van Hattum, Jan Willem Hinnen, Jeroen J

1 Kolkman, Maarten J van der Laan, Kaatje Lenaerts, Adriaan Moelker, Desirée van  
2 Noord, Maikel P Peppelenbosch, André S van Petersen, Pepijn Rijnja, Peter J van der  
3 Schaar, Luke G Terlouw, Hence J M Verhagen, Jean Paul P M de Vries, Dammis  
4 Vroegindewij.  
5  
6  
7  
8  
9  
10  
11  
12  
13  
14  
15  
16  
17  
18  
19  
20  
21  
22  
23  
24  
25  
26  
27  
28  
29  
30  
31  
32  
33  
34  
35  
36  
37  
38  
39  
40  
41  
42  
43  
44  
45  
46  
47  
48  
49  
50  
51  
52  
53  
54  
55  
56  
57  
58  
59  
60

For peer review only



1           **CORRESPONDING AUTHOR**  
2  
3  
4

5           Kaatje Lenaerts, PhD  
6  
7

8  
9           Maastricht University  
10  
11

12  
13           Department of Surgery  
14  
15

16  
17           P.O. Box 616  
18  
19

20  
21           Maastricht, 6200 MD  
22  
23

24  
25           Netherlands  
26  
27

28  
29           Phone: +31433881547  
30  
31

32  
33           Email: [kaatje.lenaerts@maastrichtuniversity.nl](mailto:kaatje.lenaerts@maastrichtuniversity.nl)  
34  
35  
36  
37  
38  
39  
40  
41  
42  
43  
44  
45  
46  
47  
48  
49  
50  
51  
52  
53  
54  
55  
56  
57  
58  
59  
60

For peer review only

## ABSTRACT

**Introduction:** Acute ~~m~~Mesenteric ischemia (AMI) is a life-threatening condition with short-term mortality of up to 80% ~~of all cases~~. The diagnosis of AMI has remained troublesome due to the non-specific clinical presentation, symptoms, and laboratory findings. Early unambiguous diagnosis of AMI is critical to prevent progression from reversible to irreversible transmural intestinal damage, thereby decreasing morbidity and improving survival. The present study aims to validate a panel of plasma biomarkers and investigate volatile organic compound (VOC) profiles in exhaled air as a tool to timely and accurately diagnose AMI.

**Methods and analysis:** In this international multicentre prospective observational study, 120 patients (> 18 years of age) will be recruited with clinical suspicion of AMI. Clinical suspicion ~~of AMI~~ is based on: (1) clinical manifestation, (2) physical examination, (3) laboratory measurements, and (4) the physician's consideration to perform a computed tomography (CT) scan. The patient's characteristics, repetitive blood samples, and exhaled air will be prospectively collected. Plasma levels of mucosal damage markers intestinal fatty acid binding protein and villin-1, as well as

1 transmurial damage marker smooth muscle 22, will be assessed by enzyme-linked  
2  
3  
4 immunosorbent assay. Analysis of VOCs in exhaled air will be performed by gas  
5  
6  
7  
8 chromatography time-of-flight mass spectrometry. Diagnosis of AMI will be based on  
9  
10  
11 CT, endovascular and surgical reports, clinical findings, and (if applicable) verified by  
12  
13  
14  
15 histopathological examination.  
16  
17  
18  
19  
20  
21

22 **Ethics and dissemination:** The study protocol was approved by the Medical Research  
23  
24  
25 Ethics Committee (METC) of Maastricht University Medical Centre+ and Maastricht  
26  
27  
28 University (METC azM/UM), the Netherlands (METC19-010) and the Ethics  
29  
30  
31 Committee Research UZ/KU Leuven, Belgium (S63500). Executive boards and local  
32  
33  
34  
35  
36 METCs of other Dutch participating centres, Gelre Ziekenhuizen (Apeldoorn), Medisch  
37  
38  
39 Spectrum Twente (Enschede), and University Medical Centre Groningen, have  
40  
41  
42 granted permission to carry out this study. Study results will be disseminated via open-  
43  
44  
45  
46 access peer-reviewed scientific journals and national/international conferences.  
47  
48  
49  
50  
51  
52  
53

## 54 **KEYWORDS**

55  
56  
57  
58  
59  
60

1 acute mesenteric ischemia; plasma and serum biomarkers; volatile organic  
2  
3  
4  
5 compounds, diagnosis.  
6  
7  
8  
9  
10  
11  
12  
13  
14  
15  
16  
17  
18  
19  
20  
21  
22  
23  
24  
25  
26  
27  
28  
29  
30  
31  
32  
33  
34  
35  
36  
37  
38  
39  
40  
41  
42  
43  
44  
45  
46  
47  
48  
49  
50  
51  
52  
53  
54  
55  
56  
57  
58  
59  
60

For peer review only

## PROTOCOL VERSION

Issue date: 20-03-2020

Version: 4 (February 24, 2020)

Protocol amendment number: 1

Authors: Annet Duivenvoorden (AD) and Kaatje Lenaerts (KL)

Primary reason for amendment: Change of primary sponsor

## CLINICAL STUDY PROTOCOL GUIDELINES

The ~~manuscript-protocol~~ has been ~~reported~~written according to the STROBE statement (<http://www.strobe-statement.org/>) (1) and STARD guidelines (<https://www.equator-network.org/reporting-guidelines/stard/>) (2). The checklists are given as online supplementary materials.

## STRENGTHS AND LIMITATIONS OF THIS STUDY

- This is the first observational prospective clinical study that evaluates a panel of novel biomarkers for acute mesenteric ischemia in a multicentre international clinical cohort.

- 1 • This study will provide the first data on breath analysis in patients suspected of  
2  
3  
4 acute mesenteric ischemia.  
5  
6  
7
- 8 • This study will rely on accurate clinical documentation and a high-quality biobank.  
9  
10
- 11 • Patient inclusion is challenging due to acute condition of most patients and low  
12  
13  
14  
15 incidence of acute mesenteric ischemia.  
16  
17

18  
19  
20  
21  
22  
23  
24  
25  
26  
27  
28  
29  
30  
31  
32  
33  
34  
35  
36  
37  
38  
39  
40  
41  
42  
43  
44  
45  
46  
47  
48  
49  
50  
51  
52  
53  
54  
55  
56  
57  
58  
59  
60

For peer review only

## INTRODUCTION

### Background

Acute mesenteric ischemia (AMI) is a life-threatening condition caused by a sudden interruption of blood flow, resulting in decreased supply of oxygen and nutrients to a segment of the intestinal tract. Prolonged periods of AMI lead to cellular damage and, when left untreated, to necrosis of the intestinal wall, which may cause peritonitis (1, 2). The occurrence of AMI is rare, with a reported incidence between 0.09 to 0.2% (for all admissions to emergency departments) in patients with an unknown cause of abdominal pain (3-5) but strongly increases with age (6). It remains a highly underestimated clinical emergency with short-term mortality of up to 80% (7-11). The clinical presentation for AMI is marked by non-specific signs and symptoms, including abdominal pain, elevated white blood cell count, and metabolic acidosis (7, 9, 10, 12). The non-specific clinical presentation of AMI, combined with the absence of a specific serum/plasma marker, often leads to a delay in the diagnosis. Available conventional blood laboratory tests such as leucocytes, c - reactive protein, lactate, and D-dimer have a restricted specificity to aid in diagnosing AMI (13-17). Radiological imaging is one of the most commonly used non-invasive techniques for confirming AMI. (12, 18,

1 19). Computed tomography can be performed quickly compared with standard  
2  
3  
4 laboratory tests, and when combined with contrast enhancement of the vessels, so-  
5  
6  
7  
8 called CT angiography (CTA) provides a detailed visualization of the intestines and  
9  
10  
11 mesenteric vasculature. CTA is the current gold standard imaging modality for  
12  
13  
14  
15 diagnosing AMI, with an estimated sensitivity and specificity of around 89-100% (12,  
16  
17  
18 13). However, this is probably an overestimation since the study cohort primarily  
19  
20  
21  
22 consisted of patients with advanced mesenteric ischemia and not early or progressive  
23  
24  
25 mesenteric ischemia (6). Moreover, a considerable percentage of patients with AMI  
26  
27  
28  
29 present without ischemia-specific CT signs, which overlap with other acute abdominal  
30  
31  
32  
33 complications (20-22). Therefore, an around-the-clock available, highly accurate,  
34  
35  
36 minimally invasive, and rapid diagnostic test can increase the index of suspicion for  
37  
38  
39 early AMI, reducing the time to adequate treatment.  
40  
41  
42

43 In recent years, several clinical studies investigated more specific serological markers  
44  
45  
46  
47 for diagnosing AMI and determining the severity of ischemic intestinal damage (23-  
48  
49  
50 25). One of these potential biomarkers for AMI is intestinal fatty acid binding protein  
51  
52  
53  
54 (I-FABP), a small cytosolic protein that is abundantly expressed in mature enterocytes  
55  
56  
57  
58 (26). Upon a decrease in bowel perfusion and consequent loss of enterocyte cell  
59  
60



1 membrane integrity, a rapid release of I-FABP within the circulation is observed (23,  
2  
3  
4 27). Another mucosal marker for detecting intestinal mucosal damage is villin-1 (VIL-  
5  
6  
7  
8 1), which, similar to I-FABP, is detectable in the plasma of rat and human models of  
9  
10  
11 mesenteric ischemia (24). As opposed to I-FABP, VIL-1 remains detectable in plasma  
12  
13  
14  
15 for more extended periods after the onset of ischemic damage in rats (23, 24). These  
16  
17  
18 findings identify I-FABP as a potential marker for early intestinal mucosal injury and  
19  
20  
21 VIL-1 as a potential marker for persisting ischemic mucosal damage. Sustained  
22  
23  
24 periods of mesenteric ischemia can lead to ischemia of the intestinal muscle layers  
25  
26  
27  
28 and, when left untreated, result in transmural ischemia. Currently, known markers of  
29  
30  
31 mesenteric ischemic damage focus primarily on mucosal injury, but they provide no  
32  
33  
34  
35 insight regarding the possible Development-development of transmural ischemia. An  
36  
37  
38  
39 earlier study showed that plasma levels of smooth muscle 22 (SM22) could  
40  
41  
42 differentiate between patients with transmural ischemia and those with mesenteric  
43  
44  
45 ischemia confined to the mucosal layer (25). SM22 is a small protein (22 kDa) with a  
46  
47  
48 high expression in intestinal smooth muscle tissue (28, 29) and is released upon  
49  
50  
51 sustaining ischemic damage. However, the SM22 protein is not exclusively expressed  
52  
53  
54 in the intestinal muscle tissue (29) . Still, in combination with other specific markers for  
55  
56  
57 intestinal mucosal damage, such as I-FABP, it is expected to provide insight into the  
58  
59  
60

1 severity and progression of intestinal injury in patients with AMI. Unfortunately, none  
2  
3  
4 of the described markers have yet to make their appearance in the clinic. Currently,  
5  
6  
7  
8 there is limited knowledge of the I-FABP, VIL-1, and SM22 specificity in patients with  
9  
10  
11 AMI.  
12  
13  
14

15  
16 In recent years, analysis of volatile organic compounds (VOCs) in exhaled air to  
17  
18  
19 diagnose various pathologies has gained increasing interest. The exhaled air of  
20  
21  
22  
23 humans consists of a broad spectrum of VOCs. The composition of these VOCs is  
24  
25  
26 influenced by exogenous (oral ingestion, smoking, air quality) and endogenous  
27  
28  
29 (activity, microbiome, hormonal) factors (30). The hundreds of VOCs in exhaled air  
30  
31  
32  
33 can give valuable information about various (patho)physiologic processes. The  
34  
35  
36 analysis of VOCs in exhaled air is a non-invasive technique that has already been  
37  
38  
39  
40 demonstrated to differentiate between multiple clinical conditions and healthy  
41  
42  
43  
44 subjects, including inflammatory bowel disease and non-alcoholic steatohepatitis (31).  
45  
46

47  
48 In 2011, a pilot study in the analysis of VOCs in rats following acute superior  
49  
50  
51 mesenteric artery (SMA) occlusion showed that they were able to identify a small  
52  
53  
54  
55 cluster of VOCs that increase during ischemic bowel injury (32). Other studies<sup>7</sup> have  
56  
57  
58 explored the possibility of monitoring exhaled methane (CH<sub>4</sub>) concentrations in order  
59  
60

1 to detect SMA malperfusion (33). This is now being investigated in a prospective  
2  
3  
4 observational study in patients with trauma-related haemorrhage following blunt  
5  
6  
7  
8 trauma (34). Based on these findings we could speculate that CH<sub>4</sub> concentrations  
9  
10  
11 could be relevant in our future measurements and analyses. As the pathophysiologic  
12  
13  
14  
15 processes of inflammatory bowel disease and AMI share common mechanisms, it is  
16  
17  
18 expected that VOC profiling could aid in diagnosing AMI in a rapid and non-invasive  
19  
20  
21  
22 manner in the future (35).  
23  
24  
25  
26  
27  
28  
29  
30  
31  
32  
33  
34  
35  
36  
37  
38  
39  
40  
41  
42  
43  
44  
45  
46  
47  
48  
49  
50  
51  
52  
53  
54  
55  
56  
57  
58  
59  
60

## METHODS AND ANALYSIS

### Objectives

This study aims to improve the diagnosis of patients with AMI. Our primary objective is to validate the diagnostic accuracy of a selected panel of plasma and serum biomarkers, I-FABP, SM22, and VIL-1, in patients with AMI. Furthermore, we will investigate if these markers can determine the severity of ischemic intestinal damage.

The secondary objective of this study is to identify a VOC profile in exhaled breath to identify AMI non-invasively.

### Study design and eligibility criteria

The current study is an international multicentre, prospective observational study aiming to include 120 patients with acute abdominal symptoms fitting to AMI. The main objective is to compare biomarker expression in 60 patients with confirmed mesenteric ischemia and 60 patients with another clinical condition. We may include a higher percentage of patients without mesenteric ischemia due to its non-specific clinical presentation and low overall incidence. Therefore, study inclusions will be finalized when 60 patients with confirmed AMI are included (3-5). Patients clinically suspected of AMI will be screened for inclusion at one of the participating centres. All study

1 participants must fulfil the study inclusion criteria and will be excluded from  
2  
3  
4 participation if they cannot provide written informed consent or do not fulfil the inclusion  
5  
6  
7  
8 criteria (Text Box 1: Inclusion and exclusion criteria). Patients are eligible for study  
9  
10  
11 participation if they have a clinically suspicion of AMI, which is based on (1) the clinical  
12  
13  
14 manifestation of the disease, (2) physical examination by the local physician, (3)  
15  
16 laboratory measurements and (4) the physician's consideration to perform a CT(A)-  
17  
18 scan. If all criteria are met, the physician will contact the local research team and the  
19  
20 patient or legal representative will be asked for informed consent to participate in the  
21  
22 study. Clinical study procedures are initiated when all criteria are met and informed  
23  
24 consent is obtained from the patient or legal representative. After inclusion, blood and  
25  
26 exhaled breath will be collected at consecutive time points (Figure 1).  
27  
28  
29  
30  
31  
32  
33  
34  
35  
36  
37  
38  
39

### 40 Study Sponsor

41  
42  
43  
44 The sponsor (Maastricht University, Maastricht, The Netherlands) is responsible for  
45  
46  
47 the study design and management and for obtaining all study authorizations (Clinical  
48  
49  
50  
51 Trial Centre Maastricht and medical research ethics committee). Furthermore, the  
52  
53  
54 study sponsor also declares all information regarding the inclusion period, beginning  
55  
56  
57 and end, final study report, and study results to these authorities. Last, all obtained  
58  
59  
60

1 study samples and study-related documents will be stored for at least 15 years after  
2  
3  
4 the study ends.  
5  
6  
7

### 8 **Study population and participating medical centres**

9  
10  
11  
12 The study population will consist of patients clinically suspected of AMI admitted at  
13  
14  
15  
16 Maastricht University Medical Centre+ (MUMC+, Maastricht, The Netherlands),  
17  
18  
19  
20 Amsterdam University Medical Centre (AUMC), location VUmc and AMC, Gelre  
21  
22  
23 Ziekenhuizen Apeldoorn (Apeldoorn, The Netherlands), Medisch Spectrum Twente,  
24  
25  
26  
27 Enschede, The Netherlands, University Medical Centre Groningen, The Netherlands  
28  
29  
30 and University Hospitals Leuven, Belgium. The clinical course of all patients will be  
31  
32  
33  
34 monitored throughout the study, and medical information will be collected, including  
35  
36  
37  
38 medical history, medication, vital signs, medical imaging, and information regarding  
39  
40  
41 clinical management during admission. The study has been open for inclusion since  
42  
43  
44  
45 June 2020.  
46  
47

### 48 **Clinical study procedures**

49  
50  
51  
52 Samples will be collected from included patients with a clinical suspicion of AMI at  
53  
54  
55  
56 different time points with an in-hospital follow-up of a maximum of five days after  
57  
58  
59  
60 inclusion (Figure 1). several baseline characteristics will be acquired at inclusion and

1 during participation. After inclusion, blood and exhaled air samples will be collected  
2  
3  
4 every 60 minutes, up to 180 minutes. Re-establishing blood supply to the ischemic  
5  
6  
7  
8 bowel is the primary objective in patients with AMI. Therefore, patients may undergo  
9  
10  
11 endovascular revascularization to restore mesenteric blood supply. Surgical resection  
12  
13  
14 of the necrotic bowel must occur if there are signs of non-viable tissue regions after  
15  
16  
17 revascularization. If the patient undergoes an endovascular or surgical intervention,  
18  
19  
20 pre-operative and post-operative samples will be taken. Postoperatively, the patient  
21  
22  
23 will be monitored for up to five days, and samples (blood and exhaled air) will be  
24  
25  
26 collected daily, parallel with the morning routine blood collections. In addition, patients  
27  
28  
29 without any treatment interventions will also be monitored for up to five days, and  
30  
31  
32 similar blood and air samples will be obtained identically to patients with a treatment  
33  
34  
35 intervention. At the end of the study, each participant will be allocated to one of the  
36  
37  
38 two study groups (AMI versus non-AMI). Diagnosis of mesenteric ischemia will be  
39  
40  
41 based on CT, endovascular and surgical reports, clinical findings, and (if applicable)  
42  
43  
44 verified by histopathological examination.  
45  
46  
47  
48  
49  
50  
51  
52  
53

#### 54 **Blood collection and biomarker analysis**

55  
56  
57  
58  
59  
60

1 In this study, obtained blood samples will be analysed for serum and plasma biomarker  
2  
3  
4 analysis of I-FABP, SM22, and VIL-1. Blood samples will be collected via an arterial  
5  
6  
7  
8 line, an intravenous needle, or a central venous catheter. Occasionally a separate  
9  
10  
11 venapuncture can also be used to collect blood. Blood samples will be collected in  
12  
13  
14 Vacutainer tubes treated with Ethylenediaminetetraacetic acid for plasma and SST™  
15  
16  
17  
18 II Advance tubes for serum specimens. Whole blood samples will be centrifuged, and  
19  
20  
21 plasma/serum will be transferred to storage tubes. After processing, the samples are  
22  
23  
24 stored at -80°C until further analysis. I-FAPB, SM22, and VIL-1 concentrations will be  
25  
26  
27  
28 determined in plasma/serum samples through enzyme-linked immunosorbent assay  
29  
30  
31  
32 (ELISA). Highly specific I-FABP and SM22 ELISAs were developed and validated in  
33  
34  
35 our lab and selectively detect human I-FABP and human SM22 in plasma with a lower  
36  
37  
38 limit of detection of 12.5 pg/mL and 62.5 pg/mL, respectively (25, 36). The intra-assay  
39  
40  
41 and inter-assay coefficient of variation is 4.1% and 6.2%, respectively, for IFABP  
42  
43  
44 ranging from 6.2% to 14.8% and 4.9% to 16.3%, respectively, for SM22 (25, 36). VIL-1  
45  
46  
47  
48 ELISA was developed at PharmAbs (KU Leuven, Leuven, Belgium) and can detect  
49  
50  
51 human VIL-1 with a lower detection limit of 0.78 ng/mL. VIL-1 is detectable in plasma,  
52  
53  
54 however earlier studies showed a better detection in serum compared to plasma  
55  
56  
57  
58  
59  
60 (Ceulemans et al in preparation).



## Exhaled breath collection and analysis

This study's second objective focuses on using VOCs in exhaled breath as a potential diagnostic tool for AMI. Exhaled breath is collected using resistance-free plastic bags (Tedlar bag, 3L, SKC Ltd, Dorset, UK) parallel to the blood samples. To collect breath samples, the patient must breathe into the valve of the Tedlar bag, which takes three to four exhalations to fill. Exhaled breath from an incapacitated patient will be collected from mechanical ventilation through a co-axial tubing system. Collected exhaled air containing VOCs is stabilized on carbon desorption tubes (SU60520-60-S, Camsco) with a Flow air sampling pump (LFS-113, 360-041-01, Sensidyne) and stored at 4°C until further analysis by gas chromatography time of flight mass spectrometry (GC-tof-MS) (35). The GC-tof-MS analysis was performed as described previously (37).

## Study outcomes

We hypothesize that with the use of serum/plasma biomarkers I-FABP, VIL-1, and SM22, a timely diagnosis of patients with AMI before irreversible transmural bowel damage occurs will be achieved. Through a multimodal diagnostic approach, we will be able to characterize each patient's condition and correlate these biomarkers' concentration to the disease's corresponding etiology. The primary outcome is

1 plasma/serum concentrations of I-FABP, VIL-1 (markers for mucosal damage), and  
2  
3  
4 SM22 (a marker for transmural ischemia) in patients with a clinical suspicion of AMI.  
5  
6  
7

8 The sensitivity and specificity of the described biomarkers will be determined and  
9  
10  
11 compared with the current gold standard (12, 13). A receiver operating characteristic  
12  
13  
14 (ROC) curve analysis will be used to evaluate the diagnostic power of the biomarker  
15  
16  
17  
18 (panel) test.  
19  
20  
21

22 This study's secondary outcome is identifying specific VOC profiles in exhaled air of  
23  
24  
25 patients suspected of AMI. Individual compounds of these profiles will be chemically  
26  
27  
28 identified to discover novel pathophysiologic pathways involved in AMI. Furthermore,  
29  
30  
31 these VOC profiles will be used to investigate their potential use as a novel non-  
32  
33  
34  
35  
36  
37  
38  
39  
40  
41  
42  
43  
44  
45  
46  
47  
48  
49  
50  
51  
52  
53  
54  
55  
56  
57  
58  
59  
60  
invasive diagnostic technique for AMI.

#### **Data collection and management**

45 Patients will receive a patient information folder and consent forms before study  
46  
47  
48 initiation, explaining the study procedures in detail and providing information on the  
49  
50  
51 study data collection, protection, and pseudonymization of their medical information.  
52  
53  
54

55 Data will be obtained by the local study teams and registered using study-specific  
56  
57  
58 Case Report Forms (CRFs) and CASTOR (38) electronic data capture (EDC) system,  
59  
60

1 which facilitates monitoring the study progress and outcomes in real-time. To ensure  
2  
3  
4 the privacy of all individuals in this study, blood and breath samples, data, and results  
5  
6  
7  
8 of our research will be treated confidentially and encoded accordingly. The encoding  
9  
10  
11 of their personal data will ensure the patient's anonymity. The source data and  
12  
13  
14  
15 encoding key for the patient's personal data will only be accessible to the principal and  
16  
17  
18 coordinating investigator. After the termination and publication, the patients can be  
19  
20  
21 informed about their study results, which can be explained to them if requested on  
22  
23  
24  
25 their informed consent form. With the participants' approval in this study, collected  
26  
27  
28 data, blood, and exhaled air will be stored for 15 years for future research purposes.  
29  
30  
31  
32 All samples will be transported to the Department of Surgery (Maastricht University,  
33  
34  
35 Maastricht, The Netherlands), where they will be stored and analysed. All data  
36  
37  
38 concerning participants or their participation in this study will be considered  
39  
40  
41 confidential and handled in compliance with all applicable regulations. Only members  
42  
43  
44  
45 of the study team and local investigators have access to these data.  
46  
47  
48  
49

### 50 **Safety Considerations and withdrawal of participation**

51  
52  
53  
54 Patient safety and treatment is always prioritized and is not influenced by the study.  
55  
56  
57

58 The study will be suspended if there is sufficient ground that continuation of the study  
59  
60

1 will jeopardise the subject health or safety. The sponsor will notify the accredited  
2  
3  
4 Medical Ethical Board without undue delay of a temporary halt, including the reason  
5  
6  
7  
8 for such an action. The study will be suspended pending a further favorable decision  
9  
10  
11 by the accredited board. The coordinating researcher will ensure that all subjects and  
12  
13  
14  
15 (if applicable) legal representatives are kept informed during study participation.  
16

17  
18  
19 Patients participate in this research voluntarily. Any sign of patient resistance will lead  
20  
21  
22 to the discontinuation of research involving this patient. Patients or legal representative  
23  
24  
25 can withdraw their permission and leave the study at any time for any reason if they  
26  
27  
28 wish to do so without any consequences for their further treatment. For example, the  
29  
30  
31 investigator can withdraw a subject from the study for urgent medical reasons. Data  
32  
33  
34 obtained during participation can be used for future research purposes unless the  
35  
36  
37 patient or legal representative gives a written or verbal objection.  
38  
39  
40  
41  
42  
43

#### 44 **Sample size**

45  
46  
47  
48 Data from a previous study undertaken by our group was used to determine the  
49  
50  
51 sample size (25). Based on an effect size (medium to large) of 0.631 (determined by  
52  
53  
54 Cohen's d formula based on the difference in mean I-FABP levels), with a power of  
55  
56  
57 0.8 and alpha 0.05/3 (corrected for multiple testing due to analysis of three primary  
58  
59  
60

1 outcome parameters), 54 patients per group (AMI versus non-AMI) are needed for this  
2  
3  
4 cohort. By including 60 patients per group, possible dropouts (10%, n = 6) are  
5  
6  
7  
8 considered.

## 11 **Statistical analysis**

12  
13  
14  
15  
16 Statistical analysis will be performed with SPSS software (IBM) and GraphPad Prism  
17  
18  
19  
20 8 software. All the data obtained consists of continuous and categorical variables. The  
21  
22  
23 data will be tested for normality using the Kolmogorov-Smirnov test. Relative changes  
24  
25  
26 between the two groups will be tested using a Student's T-test. Dichotomous variables  
27  
28  
29 will be compared using Pearson's chi-squared test. During the statistical analysis,  
30  
31  
32 numerical values will be reported as mean  $\pm$  standard deviation or median  
33  
34  
35 (Interquartile range, i.e., 25th to 75th percentile). Relevant variables with a p-value  
36  
37  
38  $<0.05$  for univariate analysis will be introduced into a multiple logistic regression model  
39  
40  
41 using confidence intervals (CI). ). The area under the receiver operating characteristics  
42  
43  
44 curve (AUC-ROC) will be calculated and is used to determine diagnostic utilities  
45  
46  
47  
48 (sensitivity, specificity, positive predictive value and negative predictive value) of the  
49  
50  
51 biomarkers I-FABP, SM22, and VIL-1 to discriminate between AMI or non-AMI  
52  
53  
54  
55 patients. Statistical analysis of VOCs expression profiles will be performed according  
56  
57  
58  
59  
60

1 to the published standards by Horvath et al. for the exhaled breath analysis (39).  
2  
3  
4 Logistic regression analyses will be performed to investigate the most effective  
5  
6  
7  
8 biomarker combination in patients with ischemia or without ischemia. Furthermore, we  
9  
10  
11 will assess the difference in mean I-FABP, SM22, and VIL1 plasma/serum levels  
12  
13  
14 between patients suffering from AMI and those diagnosed with other clinical conditions  
15  
16  
17 at different times. The severity of the mesenteric ischemic damage will be determined  
18  
19  
20 (reversible versus non-reversible mesenteric ischemic injury) by (1) levels of plasma  
21  
22  
23 IFABP, VIL1, and SM22 at baseline and (2) an increase of IFAPB, VIL1, and SM22  
24  
25  
26 plasma levels over time as AMI progresses (until intervention).  
27  
28  
29  
30  
31  
32  
33  
34  
35  
36  
37  
38  
39  
40  
41  
42  
43  
44  
45  
46  
47  
48  
49  
50  
51  
52  
53  
54  
55  
56  
57  
58  
59  
60

## Patient and public involvement

A patient panel from The Dutch Digestive Foundation (MLDS) reviewed the grant proposal to obtain funding. There was no patient or public involvement in the design of this clinical study.

## Ethics and dissemination

The TACTIC study protocol was approved by the Medical Research Ethics Committee (METC) of Maastricht University Medical Centre+ and Maastricht University (METC azM/UM), the Netherlands (registration number METC19-010) and the Ethics Committee Research UZ/KU Leuven, Belgium (registration number S63500). Executive boards and local METCs of the Dutch participating centres, Gelre Ziekenhuizen (Apeldoorn), Medisch Spectrum Twente, (Enschede) and University Medical Centre Groningen) have granted permission to carry out this study according to the regulations of The Central Committee on Research Involving Human Subjects (CCMO, The Hague, The Netherlands). The study has been registered at ClinicalTrials.gov (NCT05194527).

This study will be conducted according to the principles of the Declaration of Helsinki (adopted by the 18th WMA General Assembly, Helsinki, Finland, June 1964, and

1 amended by the 64th WMA General Assembly, Fortaleza, Brazil, October 2013) in  
2  
3  
4 accordance with the WMO. Study results will be disseminated via open-access peer-  
5  
6  
7  
8 reviewed scientific journals and national and international conferences.  
9  
10

## 11 **Funding statement**

12  
13  
14  
15  
16 This study is funded by the MLDS, Amersfoort (grant number D17-14).  
17  
18

## 19 **Acknowledgments**

20  
21  
22  
23  
24 We want to thank S.M.J. van Kuijk for his statistical insights regarding the study  
25  
26  
27  
28 protocol. In addition, we would like to thank Professor C.H.C De Jong for his  
29  
30  
31  
32 indispensable work investigating the complex multifactorial background of AMI, which  
33  
34  
35 led to the discovery of new potential biomarkers for future clinical applications and  
36  
37  
38  
39 improving patients' clinical outcomes.  
40  
41

## 42 **Authors' Contributions**

43  
44  
45  
46  
47 KL and TL originated the study. AD, KL, LC, ~~and TL~~, and DMIS were involved in the  
48  
49  
50 study design. AD, KL, and TL drafted the manuscript. AD, RG, MC, RG, JD, JV, HB,  
51  
52  
53  
54 SOD, FSJ, LC, TL, and KL are local investigators at the participating centres. The  
55  
56  
57  
58  
59  
60



1 study is supervised and coordinated by AD, KL, and TL. All authors provided essential  
2  
3  
4 feedback to the successive manuscript versions and approved the final version.  
5  
6  
7

### 8 **Conflicts of Interest**

9  
10  
11  
12 None declared.  
13  
14  
15  
16  
17  
18  
19  
20  
21  
22  
23  
24  
25  
26  
27  
28  
29  
30  
31  
32  
33  
34  
35  
36  
37  
38  
39  
40  
41  
42  
43  
44  
45  
46  
47  
48  
49  
50  
51  
52  
53  
54  
55  
56  
57  
58  
59  
60

For peer review only

1  
2  
3  
4  
5  
6  
7  
8  
9  
10  
11  
12  
13  
14  
15  
16  
17  
18  
19  
20  
21  
22  
23  
24  
25  
26  
27  
28  
29  
30  
31  
32  
33  
34  
35  
36  
37  
38  
39  
40  
41  
42  
43  
44  
45  
46  
47  
48  
49  
50  
51  
52  
53  
54  
55  
56  
57  
58  
59  
60  

## REFERENCES

1. Bjarnason I, MacPherson A, Hollander D. Intestinal permeability: an overview. *Gastroenterology*. 1995;108(5):1566-81.
2. DeMeo MT, Mutlu EA, Keshavarzian A, Tobin MC. Intestinal permeation and gastrointestinal disease. *Journal of clinical gastroenterology*. 2002;34(4):385-96.
3. Acosta S, Björck M. Acute thrombo-embolic occlusion of the superior mesenteric artery: A prospective study in a well defined population. *European Journal of Vascular and Endovascular Surgery*. 2003;26(2):179-83.
4. Stoney RJ, Cunningham CG. Acute mesenteric ischemia. *Surgery*. 1993;114(3):489-90.
5. Duran M, Pohl E, Grabitz K, Schelzig H, Sagban TA, Simon F. The importance of open emergency surgery in the treatment of acute mesenteric ischemia. *World Journal of Emergency Surgery*. 2015;10(1).
6. Karkkainen JM, Acosta S. Acute mesenteric ischemia (part I) - Incidence, etiologies, and how to improve early diagnosis. *Best Pract Res Clin Gastroenterol*. 2017;31(1):15-25.
7. Oldenburg WA, Lau LL, Rodenberg TJ, Edmonds HJ, Burger CD. Acute Mesenteric Ischemia. *Archives of Internal Medicine*. 2004;164(10):1054-.
8. Acosta S. Epidemiology of Mesenteric Vascular Disease: Clinical Implications. *Seminars in Vascular Surgery*. 2010;23(1):4-8.
9. Bradbury AW, Brittenden J, McBride K, Ruckley CV. Mesenteric ischaemia: A multidisciplinary approach. *British Journal of Surgery*. 1995;82(11):1446-59.
10. American Gastroenterological Association Medical Position Statement: Guidelines on Intestinal Ischemia.
11. Howard TJ, Plaskon LA, Wiebke EA, Wilcox MG, Madura JA. Nonocclusive mesenteric ischemia remains a diagnostic dilemma. *The American Journal of Surgery*. 1996;171(4):405-8.
12. Menke J. Diagnostic Accuracy of Multidetector CT in Acute Mesenteric Ischemia: Systematic Review and Meta-Analysis. *Radiology*. 2010;256(1):93-101.
13. Cudnik MT, Darbha S, Jones J, Macedo J, Stockton SW, Hiestand BC. The Diagnosis of Acute Mesenteric Ischemia: A Systematic Review and Meta-analysis. *Academic Emergency Medicine*. 2013;20(11):1087-100.

14. Björck M, Koelemay M, Acosta S, Bastos Goncalves F, Kölbel T, Kolkman JJ, et al. Editor's Choice – Management of the Diseases of Mesenteric Arteries and Veins. *European Journal of Vascular and Endovascular Surgery*. 2017;53(4):460-510.
15. Nuzzo A, Maggiori L, Ronot M, Becq A, Plessier A, Gault N, et al. Predictive Factors of Intestinal Necrosis in Acute Mesenteric Ischemia: Prospective Study from an Intestinal Stroke Center. *The American Journal of Gastroenterology*. 2017;112(4):597-605.
16. Acosta S, Nilsson TK, Björck M. D-dimer testing in patients with suspected acute thromboembolic occlusion of the superior mesenteric artery. *British Journal of Surgery*. 2004;91(8):991-4.
17. Lemma A, Tolonen M, Vikatmaa P, Mentula P, Kantonen I, But A, et al. Editor's Choice – Epidemiology, Diagnostics, and Outcomes of Acute Occlusive Arterial Mesenteric Ischaemia: A Population Based Study. *European Journal of Vascular and Endovascular Surgery*. 2022;64(6):646-53.
18. Kirkpatrick IDC, Kroeker MA, Greenberg HM. Abbreviations: AMI acute mesenteric ischemia IMA inferior mesenteric artery SMA superior mesenteric artery Biphasic CT with Mesenteric CT Angiography in the Evaluation of Acute Mesenteric Ischemia: Initial Experience 1. *Radiology*. 2003;229:91-8.
19. Angelelli G, Scardapane A, Memeo M, Antonio A, Ianora S, Rotondo A. Acute bowel ischemia: CT findings. *European Journal of Radiology*. 2004;50:37-47.
20. Chou CK. CT Manifestations of Bowel Ischemia. *American Journal of Roentgenology*. 2002;178(1):87-91.
21. Chou CK, Mak CW, Tzeng WS, Chang JM. CT of small bowel ischemia. *Abdominal Imaging*. 2004;29(1).
22. Florim S, Almeida A, Rocha D, Portugal P. Acute mesenteric ischaemia: a pictorial review. *Insights into Imaging: Springer Verlag*; 2018. p. 673-82.
23. Schellekens DHSM, Grootjans J, Dello SAWG, Van Bijnen AA, Van Dam RM, Cornelis W, et al. Plasma Intestinal Fatty Acid-Binding Protein Levels Correlate With Morphologic Epithelial Intestinal Damage in a Human Translational Ischemia-reperfusion Model. 2013.
24. Ceulemans L, De Hertogh G, Farré R, Decuyper J-P, Verbeke L, Jochmans I, et al. Villin-1 Is a Novel Serological Biomarker for Intestinal Ischemia and Reperfusion Injury in Rats and Humans. *Transplantation*. 2017;101(6S2).

- 1 25. Schellekens DHSM, Reisinger KW, Lenaerts K, Hadfoune Mh, Olde Damink  
2 SW, Buurman WA, et al. SM22 a Plasma Biomarker for Human Transmural Intestinal  
3 Ischemia. *Annals of surgery*. 2018;268(1):120-6.
- 4  
5  
6 26. Derikx JPM, Schellekens DHSM, Acosta S. Serological markers for human  
7 intestinal ischemia: A systematic review. *Best Practice & Research Clinical  
8 Gastroenterology*. 2017;31(1):69-74.
- 9  
10  
11 27. Pelsers MMAL, Namiot Z, Kisielewski W, Namiot A, Januszkiewicz M,  
12 Hermens WT, et al. Intestinal-type and liver-type fatty acid-binding protein in the  
13 intestine. Tissue distribution and clinical utility. *Clinical Biochemistry*. 2003;36(7):529-  
14 35.
- 15  
16  
17 28. Lees-Miller JP, Heeley DH, Smillie LB, Kay CM. Isolation and characterization  
18 of an abundant and novel 22-kDa protein (SM22) from chicken gizzard smooth  
19 muscle. *Journal of Biological Chemistry*. 1987;262(7):2988-93.
- 20  
21  
22 29. Chiavegato A, Roelofs M, Franch R, Castellucci E, Sarinella F, Sartore S.  
23 Differential expression of SM22 isoforms in myofibroblasts and smooth muscle cells  
24 from rabbit bladder. *J Muscle Res Cell Motil*. 1999;20(2):133-46.
- 25  
26  
27 30. Sethi S, Nanda R, Chakraborty T. Clinical Application of Volatile Organic  
28 Compound Analysis for Detecting Infectious Diseases. *Clinical Microbiology  
29 Reviews*. 2013;26(3):462-75.
- 30  
31  
32 31. Van Berkel JJBN, Dallinga JW, Möller GM, Godschalk RWL, Moonen E,  
33 Wouters EFM, et al. Development of accurate classification method based on the  
34 analysis of volatile organic compounds from human exhaled air. *Journal of  
35 Chromatography B*. 2008;861(1):101-7.
- 36  
37  
38 32. Jimenez JC, DeLano F, Wilson JM, Kokubun BA, Bennion RS, Thompson JE,  
39 et al. Analysis of exhaled volatile compounds following acute superior mesenteric  
40 artery occlusion in a pilot rat study. *Ann Vasc Surg*. 2011;25(8):1113-7.
- 41  
42  
43 33. Szűcs S, Bari G, Ugocsai M, Lashkarivand RA, Lajkó N, Mohácsi Á, et al.  
44 Detection of Intestinal Tissue Perfusion by Real-Time Breath Methane Analysis in  
45 Rat and Pig Models of Mesenteric Circulatory Distress. *Critical care medicine*.  
46 2019;47(5):e403-e11.
- 47  
48  
49 34. Jávör P, Rárosi F, Horváth T, Török L, Varga E, Hartmann P. Detection of  
50 exhaled methane levels for monitoring trauma-related haemorrhage following blunt  
51 trauma: study protocol for a prospective observational study. *BMJ Open*.  
52 2022;12(7):e057872.
- 53  
54  
55  
56  
57  
58  
59  
60

- 1 35. Bodelier AGL, Smolinska A, Baranska A, Dallinga JW, Mujagic Z, Vanhees K,  
2 et al. Volatile Organic Compounds in Exhaled Air as Novel Marker for Disease  
3 Activity in Crohn's Disease. *Inflammatory Bowel Diseases*. 2015;21(8):1776-85.  
4  
5 36. van Wijck K, Wijnands KAP, Meesters DM, Boonen B, van Loon LJC,  
6 Buurman WA, et al. L-citrulline improves splanchnic perfusion and reduces gut injury  
7 during exercise. *Medicine and science in sports and exercise*. 2014;46(11):2039-46.  
8  
9 37. Kienhorst S, Van Aarle MHD, Jöbsis Q, Bannier MAGE, Kersten ETG,  
10 Damoiseaux J, et al. The ADEM2 project: early pathogenic mechanisms of preschool  
11 wheeze and a randomised controlled trial assessing the gain in health and cost-  
12 effectiveness by application of the breath test for the diagnosis of asthma in  
13 wheezing preschool children. *BMC Public Health*. 2023;23(1).  
14  
15 38. Castor EDC. Castor Electronic Data Capture 2019 [27 Aug. 2019]. Available  
16 from: <https://castoredc.com>.  
17  
18 39. Horváth I, Barnes PJ, Loukides S, Sterk PJ, Högman M, Olin A-C, et al. A  
19 European Respiratory Society technical standard: exhaled biomarkers in lung  
20 disease. *European Respiratory Journal*. 2017;49(4):1600965.  
21  
22  
23  
24  
25  
26  
27  
28  
29  
30  
31  
32  
33  
34  
35  
36  
37  
38  
39  
40  
41  
42  
43  
44  
45  
46  
47  
48  
49  
50  
51  
52  
53  
54  
55  
56  
57  
58  
59  
60

**ABBREVIATIONS**

|                   |                                                                            |
|-------------------|----------------------------------------------------------------------------|
| <b>AMI:</b>       | Acute Mesenteric Ischemia                                                  |
| <b>AUC</b>        | Area Under Curve                                                           |
| <b>CT(A):</b>     | Computed Tomography (angiography)                                          |
| <b>CRF</b>        | Case Report Form                                                           |
| <b>EDC</b>        | Electronic Data Capture                                                    |
| <b>ELISA</b>      | Enzyme-Linked Immunosorbent Assay                                          |
| <b>GS-TOF-MS:</b> | Gas chromatography time-of-flight mass spectrometry                        |
| <b>I-FABP:</b>    | Intestinal Fatty Acid Binding Protein                                      |
| <b>MLDS:</b>      | 'Maag Lever Darm Stichting' ( <a href="#">Dutch Digestive Foundation</a> ) |
| <b>PREOP:</b>     | Pre-operative                                                              |
| <b>RPF:</b>       | Reperfusion                                                                |
| <b>ROC</b>        | Receiver Operating Characteristic                                          |
| <b>SM22:</b>      | Smooth Muscle 22                                                           |
| <b>VIL-1:</b>     | villin-1                                                                   |

1 **VOC:** Volatile Organic Compounds  
2  
3  
4  
5  
6  
7  
8  
9  
10  
11  
12  
13  
14  
15  
16  
17  
18  
19  
20  
21  
22  
23  
24  
25  
26  
27  
28  
29  
30  
31  
32  
33  
34  
35  
36  
37  
38  
39  
40  
41  
42  
43  
44  
45  
46  
47  
48  
49  
50  
51  
52  
53  
54  
55  
56  
57  
58  
59  
60

For peer review only

## FIGURES LEGENDS

Figure 1: Study outline. Patients with a clinical suspicion of acute mesenteric ischemia are considered applicable for participation if all criteria are met. Patients are screened and asked for study participation by informed consent. When consent has been received, study procedures will start. Part 1: blood and exhaled air is collected every 60 minutes (min), up to 180 min (T180) after inclusion; Part 2 is initiated if the patient receives an intervention (endovascular or surgical), with a pre-operative and post-operative sample collection. Patients that do not receive the intervention will directly move into Part 3: Follow-up. Daily samples up to five days (D5) will be retrieved during routine blood collection. In the final stage of the study (Part 4: Diagnosis), each patient will be placed in one of the two study groups (AMI versus non-AMI) based on the collected data. T: time point; PRE: pre-operative; POST: post-operative.

### Text box 1: Inclusion and exclusion criteria

#### Inclusion criteria

- The ability to provide informed consent, either by themselves or by a legal representative
- The patients must be suspected of AMI, which is based on the following:



- Clinical manifestation of the disease such as sudden abdominal pain, nausea, vomiting, abdominal distension, diarrhoea, haematochezia, haematemesis, tenderness and signs of peritonitis
- Physical examination by the local physician such as body temperature, heart rate, blood pressure
- Laboratory measurements such as white blood cell count, lactate, pH, CRP
- Physician's consideration to perform CT(A) scan

#### Exclusion criteria

- Unable to provide informed consent
- < 18 years of age

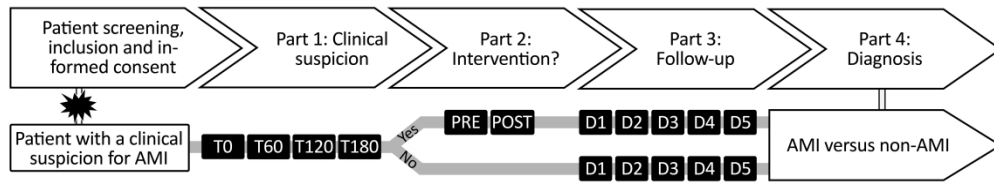

Figure 1: Study outline. Patients with a clinical suspicion of acute mesenteric ischemia are considered applicable for participation if all criteria are met. Patients are screened and asked for study participation by informed consent. When consent has been received, study procedures will start. Part 1: blood and exhaled air is collected every 60 minutes (min), up to 180 min (T180) after inclusion; Part 2 is initiated if the patient receives an intervention (endovascular or surgical), with a pre-operative and post-operative sample collection. Patients that do not receive the intervention will directly move into Part 3: Follow-up. Daily samples up to five days (D5) will be retrieved during routine blood collection. In the final stage of the study (Part 4: Diagnosis), each patient will be placed in one of the two study groups (AMI versus non-AMI) based on the collected data. T: time point; PRE: pre-operative; POST: post-operative.

594x106mm (300 x 300 DPI)

| Section & Topic          | No  | Item                                                                                                                                                   | Reported on page # |
|--------------------------|-----|--------------------------------------------------------------------------------------------------------------------------------------------------------|--------------------|
| <b>TITLE OR ABSTRACT</b> |     |                                                                                                                                                        |                    |
|                          | 1   | Identification as a study of diagnostic accuracy using at least one measure of accuracy (such as sensitivity, specificity, predictive values, or AUC)  | 1, 4               |
| <b>ABSTRACT</b>          |     |                                                                                                                                                        |                    |
|                          | 2   | Structured summary of study design, methods, results, and conclusions (for specific guidance, see STARD for Abstracts)                                 | 4-5                |
| <b>INTRODUCTION</b>      |     |                                                                                                                                                        |                    |
|                          | 3   | Scientific and clinical background, including the intended use and clinical role of the index test                                                     | 7-9                |
|                          | 4   | Study objectives and hypotheses                                                                                                                        | 10-11              |
| <b>METHODS</b>           |     |                                                                                                                                                        |                    |
| <i>Study design</i>      | 5   | Whether data collection was planned before the index test and reference standard were performed (prospective study) or after (retrospective study)     | 10-11              |
| <i>Participants</i>      | 6   | Eligibility criteria                                                                                                                                   | 10                 |
|                          | 7   | On what basis potentially eligible participants were identified (such as symptoms, results from previous tests, inclusion in registry)                 | 10-11              |
|                          | 8   | Where and when potentially eligible participants were identified (setting, location and dates)                                                         | 10-11              |
|                          | 9   | Whether participants formed a consecutive, random or convenience series                                                                                | 10-11              |
| <i>Test methods</i>      | 10a | Index test, in sufficient detail to allow replication                                                                                                  | 10-12              |
|                          | 10b | Reference standard, in sufficient detail to allow replication                                                                                          | 10-12              |
|                          | 11  | Rationale for choosing the reference standard (if alternatives exist)                                                                                  | 10-12              |
|                          | 12a | Definition of and rationale for test positivity cut-offs or result categories of the index test, distinguishing pre-specified from exploratory         | 10-12              |
|                          | 12b | Definition of and rationale for test positivity cut-offs or result categories of the reference standard, distinguishing pre-specified from exploratory | 10-12              |
|                          | 13a | Whether clinical information and reference standard results were available to the performers/readers of the index test                                 | 10-12              |
|                          | 13b | Whether clinical information and index test results were available to the assessors of the reference standard                                          | 10-12              |
| <i>Analysis</i>          | 14  | Methods for estimating or comparing measures of diagnostic accuracy                                                                                    | 12-16              |
|                          | 15  | How indeterminate index test or reference standard results were handled                                                                                | 12-16              |
|                          | 16  | How missing data on the index test and reference standard were handled                                                                                 | 12-16              |
|                          | 17  | Any analyses of variability in diagnostic accuracy, distinguishing pre-specified from exploratory                                                      | 12-16              |
|                          | 18  | Intended sample size and how it was determined                                                                                                         | 12-16              |
| <b>RESULTS</b>           |     |                                                                                                                                                        |                    |
| <i>Participants</i>      | 19  | Flow of participants, using a diagram                                                                                                                  | 10                 |
|                          | 20  | Baseline demographic and clinical characteristics of participants                                                                                      | 11                 |
|                          | 21a | Distribution of severity of disease in those with the target condition                                                                                 | 7-19, 15           |
|                          | 21b | Distribution of alternative diagnoses in those without the target condition                                                                            | 7-19, 15           |
|                          | 22  | Time interval and any clinical interventions between index test and reference standard                                                                 | N.A.               |
| <i>Test results</i>      | 23  | Cross tabulation of the index test results (or their distribution) by the results of the reference standard                                            | N.A.               |
|                          | 24  | Estimates of diagnostic accuracy and their precision (such as 95% confidence intervals)                                                                | 15-16              |
|                          | 25  | Any adverse events from performing the index test or the reference standard                                                                            | 15                 |
| <b>DISCUSSION</b>        |     |                                                                                                                                                        |                    |
|                          | 26  | Study limitations, including sources of potential bias, statistical uncertainty, and generalisability                                                  | 6                  |
|                          | 27  | Implications for practice, including the intended use and clinical role of the index test                                                              | 6-9                |
| <b>OTHER INFORMATION</b> |     |                                                                                                                                                        |                    |
|                          | 28  | Registration number and name of registry                                                                                                               | 5, 17              |
|                          | 29  | 5, 17                                                                                                                                                  | 5, 17              |
|                          | 30  | Sources of funding and other support; role of funders                                                                                                  | 5, 17              |

# STARD 2015

---

## AIM

STARD stands for “Standards for Reporting Diagnostic accuracy studies”. This list of items was developed to contribute to the completeness and transparency of reporting of diagnostic accuracy studies. Authors can use the list to write informative study reports. Editors and peer-reviewers can use it to evaluate whether the information has been included in manuscripts submitted for publication.

---

## EXPLANATION

A **diagnostic accuracy study** evaluates the ability of one or more medical tests to correctly classify study participants as having a **target condition**. This can be a disease, a disease stage, response or benefit from therapy, or an event or condition in the future. A medical test can be an imaging procedure, a laboratory test, elements from history and physical examination, a combination of these, or any other method for collecting information about the current health status of a patient.

The test whose accuracy is evaluated is called **index test**. A study can evaluate the accuracy of one or more index tests. Evaluating the ability of a medical test to correctly classify patients is typically done by comparing the distribution of the index test results with those of the **reference standard**. The reference standard is the best available method for establishing the presence or absence of the target condition. An accuracy study can rely on one or more reference standards.

If test results are categorized as either positive or negative, the cross tabulation of the index test results against those of the reference standard can be used to estimate the **sensitivity** of the index test (the proportion of participants *with* the target condition who have a positive index test), and its **specificity** (the proportion *without* the target condition who have a negative index test). From this cross tabulation (sometimes referred to as the contingency or “2x2” table), several other accuracy statistics can be estimated, such as the positive and negative **predictive values** of the test. Confidence intervals around estimates of accuracy can then be calculated to quantify the statistical **precision** of the measurements.

If the index test results can take more than two values, categorization of test results as positive or negative requires a **test positivity cut-off**. When multiple such cut-offs can be defined, authors can report a receiver operating characteristic (ROC) curve which graphically represents the combination of sensitivity and specificity for each possible test positivity cut-off. The **area under the ROC curve** informs in a single numerical value about the overall diagnostic accuracy of the index test.

The **intended use** of a medical test can be diagnosis, screening, staging, monitoring, surveillance, prediction or prognosis. The **clinical role** of a test explains its position relative to existing tests in the clinical pathway. A replacement test, for example, replaces an existing test. A triage test is used before an existing test; an add-on test is used after an existing test.

Besides diagnostic accuracy, several other outcomes and statistics may be relevant in the evaluation of medical tests. Medical tests can also be used to classify patients for purposes other than diagnosis, such as staging or prognosis. The STARD list was not explicitly developed for these other outcomes, statistics, and study types, although most STARD items would still apply.

---

## DEVELOPMENT

This STARD list was released in 2015. The 30 items were identified by an international expert group of methodologists, researchers, and editors. The guiding principle in the development of STARD was to select items that, when reported, would help readers to judge the potential for bias in the study, to appraise the applicability of the study findings and the validity of conclusions and recommendations. The list represents an update of the first version, which was published in 2003.

More information can be found on <http://www.equator-network.org/reporting-guidelines/stard>.

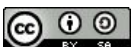

## STROBE Statement—checklist of items that should be included in reports of observational studies

|                           | Item No. | Recommendation                                                                                                                                                                                                                                                                                                                                                                                                                                                                     | Page No. | Relevant text from manuscript                                                                                                                                                                                                                                                                                                                                                                                                                                                                                                                                                                                                                                                          |
|---------------------------|----------|------------------------------------------------------------------------------------------------------------------------------------------------------------------------------------------------------------------------------------------------------------------------------------------------------------------------------------------------------------------------------------------------------------------------------------------------------------------------------------|----------|----------------------------------------------------------------------------------------------------------------------------------------------------------------------------------------------------------------------------------------------------------------------------------------------------------------------------------------------------------------------------------------------------------------------------------------------------------------------------------------------------------------------------------------------------------------------------------------------------------------------------------------------------------------------------------------|
| <b>Title and abstract</b> | 1        | (a) Indicate the study's design with a commonly used term in the title or the abstract                                                                                                                                                                                                                                                                                                                                                                                             | 1        |                                                                                                                                                                                                                                                                                                                                                                                                                                                                                                                                                                                                                                                                                        |
|                           |          | (b) Provide in the abstract an informative and balanced summary of what was done and what was found                                                                                                                                                                                                                                                                                                                                                                                | 4-5      |                                                                                                                                                                                                                                                                                                                                                                                                                                                                                                                                                                                                                                                                                        |
| <b>Introduction</b>       |          |                                                                                                                                                                                                                                                                                                                                                                                                                                                                                    |          |                                                                                                                                                                                                                                                                                                                                                                                                                                                                                                                                                                                                                                                                                        |
| Background/rationale      | 2        | Explain the scientific background and rationale for the investigation being reported                                                                                                                                                                                                                                                                                                                                                                                               | 7-9      |                                                                                                                                                                                                                                                                                                                                                                                                                                                                                                                                                                                                                                                                                        |
| Objectives                | 3        | State specific objectives, including any prespecified hypotheses                                                                                                                                                                                                                                                                                                                                                                                                                   | 7-10     |                                                                                                                                                                                                                                                                                                                                                                                                                                                                                                                                                                                                                                                                                        |
| <b>Methods</b>            |          |                                                                                                                                                                                                                                                                                                                                                                                                                                                                                    |          |                                                                                                                                                                                                                                                                                                                                                                                                                                                                                                                                                                                                                                                                                        |
| Study design              | 4        | Present key elements of study design early in the paper                                                                                                                                                                                                                                                                                                                                                                                                                            | 10       |                                                                                                                                                                                                                                                                                                                                                                                                                                                                                                                                                                                                                                                                                        |
| Setting                   | 5        | Describe the setting, locations, and relevant dates, including periods of recruitment, exposure, follow-up, and data collection                                                                                                                                                                                                                                                                                                                                                    | 10-18    |                                                                                                                                                                                                                                                                                                                                                                                                                                                                                                                                                                                                                                                                                        |
| Participants              | 6        | <p>(a) <i>Cohort study</i>—Give the eligibility criteria, and the sources and methods of selection of participants. Describe methods of follow-up</p> <p><i>Case-control study</i>—Give the eligibility criteria, and the sources and methods of case ascertainment and control selection. Give the rationale for the choice of cases and controls</p> <p><i>Cross-sectional study</i>—Give the eligibility criteria, and the sources and methods of selection of participants</p> |          | (A) Patients clinically suspected of AMI will be screened for inclusion at one of the participating centres. All study participants must fulfil the study inclusion criteria and will be excluded from participation if they cannot provide written informed consent or do not fulfil the inclusion criteria (Text Box 1: Inclusion and exclusion criteria). Patient are eligible for study participation if they have a clinically suspicion of AMI, which is based on (1) the clinical manifestation of the disease, (2) physical examination by the local physician, (3) laboratory measurements and (4) the physician's consideration to perform a CT(A)-scan. If all criteria are |

met, the physician will contact the local research team and the patient or legal representative will be asked for informed consent to participate in the study. Clinical study procedures are initiated when all criteria are met and informed consent is obtained from the patient or legal representative. After inclusion, blood and exhaled breath will be collected at consecutive time points

(b) *Cohort study*—For matched studies, give matching criteria and number of exposed and unexposed

*Case-control study*—For matched studies, give matching criteria and the number of controls per case

|                              |    |                                                                                                                                                                                      |           |
|------------------------------|----|--------------------------------------------------------------------------------------------------------------------------------------------------------------------------------------|-----------|
| Variables                    | 7  | Clearly define all outcomes, exposures, predictors, potential confounders, and effect modifiers. Give diagnostic criteria, if applicable                                             | 13-14, 16 |
| Data sources/<br>measurement | 8* | For each variable of interest, give sources of data and details of methods of assessment (measurement). Describe comparability of assessment methods if there is more than one group | 10-16     |
| Bias                         | 9  | Describe any efforts to address potential sources of bias                                                                                                                            | 10-16     |
| Study size                   | 10 | Explain how the study size was arrived at                                                                                                                                            | 15        |

Continued on next page

|                        |     |                                                                                                                                                                                                                    |       |
|------------------------|-----|--------------------------------------------------------------------------------------------------------------------------------------------------------------------------------------------------------------------|-------|
| Quantitative variables | 11  | Explain how quantitative variables were handled in the analyses. If applicable, describe which groupings were chosen and why                                                                                       | 16    |
| Statistical methods    | 12  | (a) Describe all statistical methods, including those used to control for confounding                                                                                                                              | 16    |
|                        |     | (b) Describe any methods used to examine subgroups and interactions                                                                                                                                                | 16    |
|                        |     | (c) Explain how missing data were addressed                                                                                                                                                                        | 16    |
|                        |     | (d) <i>Cohort study</i> —If applicable, explain how loss to follow-up was addressed                                                                                                                                | 16    |
|                        |     | <i>Case-control study</i> —If applicable, explain how matching of cases and controls was addressed<br><i>Cross-sectional study</i> —If applicable, describe analytical methods taking account of sampling strategy |       |
|                        |     | (e) Describe any sensitivity analyses                                                                                                                                                                              | 16    |
| <b>Results</b>         |     |                                                                                                                                                                                                                    |       |
| Participants           | 13* | (a) Report numbers of individuals at each stage of study—eg numbers potentially eligible, examined for eligibility, confirmed eligible, included in the study, completing follow-up, and analysed                  | 10    |
|                        |     | (b) Give reasons for non-participation at each stage                                                                                                                                                               | 10,15 |
|                        |     | (c) Consider use of a flow diagram                                                                                                                                                                                 | 10,11 |
| Descriptive data       | 14* | (a) Give characteristics of study participants (eg demographic, clinical, social) and information on exposures and potential confounders                                                                           | N.A.  |
|                        |     | (b) Indicate number of participants with missing data for each variable of interest                                                                                                                                | 16    |
|                        |     | (c) <i>Cohort study</i> —Summarise follow-up time (eg, average and total amount)                                                                                                                                   | 10-12 |
| Outcome data           | 15* | <i>Cohort study</i> —Report numbers of outcome events or summary measures over time                                                                                                                                | 10-14 |
|                        |     | <i>Case-control study</i> —Report numbers in each exposure category, or summary measures of exposure                                                                                                               |       |
|                        |     | <i>Cross-sectional study</i> —Report numbers of outcome events or summary measures                                                                                                                                 |       |
| Main results           | 16  | (a) Give unadjusted estimates and, if applicable, confounder-adjusted estimates and their precision (eg, 95% confidence interval). Make clear which confounders were adjusted for and why they were included       | N.A.  |
|                        |     | (b) Report category boundaries when continuous variables were categorized                                                                                                                                          | N.A.  |
|                        |     | (c) If relevant, consider translating estimates of relative risk into absolute risk for a meaningful time period                                                                                                   | N.A.  |

Continued on next page

|                          |    |                                                                                                                                                                            |      |
|--------------------------|----|----------------------------------------------------------------------------------------------------------------------------------------------------------------------------|------|
| Other analyses           | 17 | Report other analyses done—eg analyses of subgroups and interactions, and sensitivity analyses                                                                             | N.A. |
| <b>Discussion</b>        |    |                                                                                                                                                                            |      |
| Key results              | 18 | Summarise key results with reference to study objectives                                                                                                                   | N.A. |
| Limitations              | 19 | Discuss limitations of the study, taking into account sources of potential bias or imprecision. Discuss both direction and magnitude of any potential bias                 | 6    |
| Interpretation           | 20 | Give a cautious overall interpretation of results considering objectives, limitations, multiplicity of analyses, results from similar studies, and other relevant evidence | 6    |
| Generalisability         | 21 | Discuss the generalisability (external validity) of the study results                                                                                                      | 6    |
| <b>Other information</b> |    |                                                                                                                                                                            |      |
| Funding                  | 22 | Give the source of funding and the role of the funders for the present study and, if applicable, for the original study on which the present article is based              | 17   |

\*Give information separately for cases and controls in case-control studies and, if applicable, for exposed and unexposed groups in cohort and cross-sectional studies.

**Note:** An Explanation and Elaboration article discusses each checklist item and gives methodological background and published examples of transparent reporting. The STROBE checklist is best used in conjunction with this article (freely available on the Web sites of PLoS Medicine at <http://www.plosmedicine.org/>, Annals of Internal Medicine at <http://www.annals.org/>, and Epidemiology at <http://www.epidem.com/>). Information on the STROBE Initiative is available at [www.strobe-statement.org](http://www.strobe-statement.org).
